# Supplementary material for: A Mixed Heterobimetallic Y/Eu-MOF for the Cyanosilylation and Hydroboration of Carbonyls
Source: MDPI journal article supplement (doi:10.3390/catal12030299), 2022-03-06
Supplement: s1 [file s1]

Supporting Information for:

## **A Mixed Heterobimetallic Y/Eu-MOF for the Cyanosilylation and Hydroboration of Carbonyls**

Estitxu Echenique-Errandonea,<sup>1,+</sup> Mireya E. López-Vargas,<sup>2,+</sup> Juana M. Pérez,<sup>2</sup> Sara Rojas,<sup>3</sup> Duane Choquesillo-Lazarte,<sup>4</sup> José M. Seco,<sup>1</sup> Ignacio Fernández<sup>2,\*</sup> and Antonio Rodríguez-Diéguez<sup>3,\*</sup>

<sup>1</sup> Departamento de Química Aplicada, Universidad del País Vasco UPV/EHU, Paseo Manuel Lardizabal, Nº 3, 20018, Donostia-San Sebastián, Spain.

<sup>2</sup> Department of Chemistry and Physics, Research Centre CIAIMBITAL, University of Almería, Ctra. Sacramento, s/n, 04120, Almería, Spain. Email: [ifernan@ual.es](mailto:ifernan@ual.es)

<sup>3</sup> Departamento de Química Inorgánica, Facultad de Ciencias, Universidad de Granada, Av. Fuentenueva s/n, 18071 Granada, Spain. Email: [antonio5@ugr.es](mailto:antonio5@ugr.es)

<sup>4</sup> Laboratorio de Estudios Cristalográficos, IACT, CSIC-UGR, Av. Las Palmeras nº4, Armilla, 18100 Granada, Spain.

+ Both authors have contributed equally

## Table of Contents:

|                                                                     |    |
|---------------------------------------------------------------------|----|
| 1. General experimental information.....                            | 3  |
| 2. General procedures.....                                          | 6  |
| 3. Chemical characterization of compounds.....                      | 7  |
| 4. Crystallographic data.....                                       | 8  |
| 5. Selected bond lengths and angles data .....                      | 9  |
| 6. Powder X-ray diffraction analysis.....                           | 13 |
| 7. FTIR analysis of Ligand and Catalyst .....                       | 14 |
| 8. Continuous Shape Measurements.....                               | 15 |
| 9. Scanning Electron Microscopy.....                                | 17 |
| 10. Particle size distribution of catalyst.....                     | 18 |
| 11. Study of $\zeta$ -potential at different pH values.....         | 21 |
| 12. Optimization of the hydroboration reaction conditions.....      | 23 |
| 13. Characterization Data of Products.....                          | 24 |
| 14. Catalyst Recyclability.....                                     | 28 |
| 15. Leaching test.....                                              | 30 |
| 16. TOF of Y/Eu-MOF.....                                            | 31 |
| 17. Green chemistry metrics.....                                    | 32 |
| 18. Results obtained with different lanthanides MOF catalysts. .... | 33 |
| 19. References .....                                                | 35 |

## 1. General experimental information

**Elemental analyses** (EA) of synthesized novel catalyst compound **Y/Eu-MOF** performed on an Elementar vario EL cube in the CHN mode.

**IR (ATR) spectra** of 3-amino-4-hydroxybenzoic acid ligand and compound **Y/Eu-MOF** collected in the region 400–4000  $\text{cm}^{-1}$  on a Nicolet 6700 FTIR (Fourier transform infrared) spectrophotometer (Thermo Fisher Scientific, TX, USA) KBr pellets.

**NMR measurements:** NMR spectra were measured in a Bruker Avance III 300 spectrometer equipped with a direct double SmartProbe BBFO  $^1\text{H}/\text{BB}(^{19}\text{F})$  probe. Chemical shifts are reported in parts per million (ppm) relative to residual solvent peak ( $\text{CDCl}_3$ ,  $^1\text{H}$ : 7.26 ppm;  $^{13}\text{C}$ : 77.16 ppm). Coupling constants are reported in Hertz. Multiplicity is reported with the usual abbreviations (s: singlet, bs: broad singlet, d: doublet, dd: doublet of doublets, ddd: doublet of doublet of doublets, t: triplet, td: triplet of doublets, q: quartet, dq: doublet of quartet, p: pentet, sex: sextet, hept: heptet, m: multiplet).

**ICP-AES** analysis of catalyst **1Y-Eu** was conducted in Horiba Yobin Yvon Activa atomic emission spectrometer equipped with a glass and Teflon nebulizer system, which enables samples from acidic digestion to be determined using HF. This equipment also provides the option of coupling a hydride generation system which enables elements such as As, Hg and Sb, etc. to be determined, in very low levels of concentration (ppb). The equipment is controlled by a control computer with Activa Analyst 5.4 software, which enables it to interact with the equipment at all times. It permits sequential multi-elemental analysis and also enables numerous analytical requirements to be met due to the large linear interval that characterizes this technique, which in turn facilitates the analysis of majority and minority elements.

**SEM-EDX**, Scanning Electron Microscopy (SEM Leo 1430 VP) with microanalysis of elements (EDX): Scanning electron microscopy, SEM Leo 1430VP, linked to a system for the microanalysis of elements via energy-dispersive X-ray spectroscopy, Inca 350, version 17 (hereinafter, SEM-EDX). Scanning electron microscopy enables the identification of elements with low atomic numbers, including carbon.

**X-ray Diffraction Data Collection and Structure Determination.** Single-crystal diffraction data were collected at 100(2) K on a Bruker X8 APEX II and Bruker D8 Venture with a Photon detector equipped with graphite monochromated MoK $\alpha$  radiation ( $\lambda = 0.71073$  Å). The data reduction was performed with the APEX2 software[1] and corrected for absorption using SADABS.[2] These structures were solved by direct methods using the SHELXT program[3] and refined by full-matrix least-squares of F2 including all reflections with SHELXL-2018/3 program.[4] All calculations for these structures were performed using the WINGX crystallographic software package.[5]

**Powder X-ray diffractions (XRPD)** patterns were collected on a Philips X'PERT powder diffractometer with Cu K $\alpha$  radiation ( $\lambda = 1.5418$  Å) over the range of  $5 < 2\theta < 50^\circ$  with a step size of  $0.02^\circ$  and an acquisition time of 2.5 s per step at 25 °C. Indexation of the diffraction profiles were carried out using the FULLPROF program,[6] on the basis of the space group and cell parameters found for isostructural compounds by single crystal X-ray diffraction.

**Electrophoretic mobility and  $\zeta$ -potential** measurements were made in a ZetaSizer Nano-Z ZEN2600 instrument, DTS1070 cell type and laser wavelength of 632.8 nm. Samples were prepared at 0.05% w/w, dispersing 2.5 mg of the powder and making up to weight with distilled water. Two vials per measuring point were prepared, adjusting the pH manually under magnetic stirring with NaOH and HCl solutions. The dispersions were sonicated after preparation for 1 min to tear the aggregates. Subsequently, they were shaken and left for sedimentation for another 5 min. After this time, the supernatant was extracted, and the deposit was placed in the stove at 70°C to estimate the representative amount of sample studied. Afterwards, the pH of the supernatants was checked, and the conductivity was set to 330  $\mu$ S/cm with NaCl 0.1 M. Samples were shaken vigorously prior to their insertion into

the measuring devices. Equilibration time was set to 120 s. Average results obtained from 5 measurements.

**Optic micrograph analysis** was carried out with a Nikon Eclipse Ti-E motorized inverted microscope equipped with objectives: Plan Fluor 10x, Plan apochromatic 20x, 40x, 60x oil, with a transmission detector.

## 2. General procedures

**General procedure for the scale-up synthesis of Y/Eu-MOF**  
 $\{[Y_{3.5}Eu_{1.5}L_6(OH)_3(H_2O)_3] \cdot 12DMF\}_n$ : 3-amino-4-hydroxybenzoic acid (0.2 g, 1.2 mmol) was weighted and dissolved in 1.2/3 mL DMF/H<sub>2</sub>O solvent-mixture containing 200  $\mu$ l of Et<sub>3</sub>N (1.44 mmol). To this solution, a metal mixture composed by 0.124 g (0.289 mmol) of Eu(NO<sub>3</sub>)<sub>3</sub>·5H<sub>2</sub>O and 0.221 g (0.578mmol) of Y(NO<sub>3</sub>)<sub>3</sub>·6H<sub>2</sub>O previously dissolved in 1.8 mL water, was added dropwise keeping magnetic agitation. A brownish precipitate stars appearing while metal solution is added, nonetheless it ends up redissolving to give rise to a solution. After heating in the oven at 100 °C for 2 hours, single crystalline product was obtained (83 mg) of heterobimetallic **Y/Eu-MOF**. PXRD allowed us confirming the purity of the sample.

**Quantitative NMR acquisition parameters.** <sup>1</sup>H NMR determination of product conversion was carried out by comparing signals arising from both CH of aldehyde or CH<sub>3</sub> of ketone **1** and products **2**, **3** or **4**. The standard acquisition parameters were one-dimensional pulse sequence which includes a 30° flip angle (Bruker zg30), recycle time (D1 = 30 s), time domain (TD = 27k), number of scans (NS = 32), acquisition time (AQ = 2.05 s), transmitter (frequency) offset (O1P = 6.0 ppm), and spectral width (SW = 22.0 ppm).

### 3. Chemical characterization of compounds

#### Elemental analysis

**Table S1.** Elemental analysis of compounds **Y/Eu-MOF**.

| Compound     | Formula                                    | Molecular weight | Calc.                                                                    | Found.                                                                   |
|--------------|--------------------------------------------|------------------|--------------------------------------------------------------------------|--------------------------------------------------------------------------|
| <b>1Y-Eu</b> | $C_{78}H_{115}N_{18}O_{36}Y_{3.5}Eu_{1.5}$ | 2419.98          | C: 38.71;<br>H: 4.79;<br>N: 10.42;<br>O: 23.80;<br>Y: 12.86;<br>Eu: 9.42 | C: 38.76;<br>H: 4.83;<br>N: 10.44;<br>O: 23.81;<br>Y: 12.88;<br>Eu: 9.46 |

#### Determination of the metal content by ICP-AES

**Table S2.** ICP-AES results of compound **Y/Eu-MOF**.

| Compound     | Y content in $mgL^{-1}$ | Eu content in $mgL^{-1}$ | Y to Eu relationship |
|--------------|-------------------------|--------------------------|----------------------|
| <b>1Y-Eu</b> | 1672 (18.8 mM)          | 1268 (8.34 mM)           | $\pm 2.25 \sim 2.33$ |

## 4. Crystallographic data

**Table S3.** Crystallographic data and structure refinement details of compound **Y/Eu-MOF**.

| Compound                                         | Y/Eu-MOF                                                                                            |
|--------------------------------------------------|-----------------------------------------------------------------------------------------------------|
| Formula                                          | C <sub>78</sub> H <sub>115</sub> N <sub>18</sub> O <sub>36</sub> Y <sub>3.5</sub> Eu <sub>1.5</sub> |
| $M_r$                                            | 2419.98                                                                                             |
| Crystal system                                   | hexagonal                                                                                           |
| Space group (no.)                                | $P6_3/m$ (176)                                                                                      |
| a(Å)                                             | 15.8510(3)                                                                                          |
| b(Å)                                             | 15.8510(3)                                                                                          |
| c(Å)                                             | 16.8255(7)                                                                                          |
| $\alpha(^{\circ})$                               | 90                                                                                                  |
| $\beta(^{\circ})$                                | 90                                                                                                  |
| $\gamma(^{\circ})$                               | 120                                                                                                 |
| V(Å <sup>3</sup> )                               | 3661.1(2)                                                                                           |
| Z                                                | 2                                                                                                   |
| $\rho_{\text{calc}}/\text{cm}^3$                 | 2.193                                                                                               |
| $\mu/\text{mm}^{-1}$                             | 4.130                                                                                               |
| F(000)                                           | 2454.0                                                                                              |
| Crystal size/mm <sup>3</sup>                     | 0.658 × 0.167 × 0.103                                                                               |
| Radiation                                        | MoK $\alpha$ ( $\lambda$ = 0.71073)                                                                 |
| 2 $\Theta$ range for data collection/ $^{\circ}$ | 5.14 to 54.952                                                                                      |
| Index ranges                                     | -18 ≤ h ≤ 20, -20 ≤ k ≤ 20, -21 ≤ l ≤ 21                                                            |
| Reflections collected                            | 72657                                                                                               |
| Independent reflections                          | 2898 [ $R_{\text{int}}$ = 0.0886, $R_{\text{sigma}}$ = 0.0238]                                      |
| Data/restraints/parameters                       | 2898/0/123                                                                                          |
| Goodness-of-fit on F <sup>2</sup>                | 1.127                                                                                               |
| Final R indexes [ $I \geq 2\sigma(I)$ ]          | $R_1$ = 0.0276, $wR_2$ = 0.0889                                                                     |
| Final R indexes [all data]                       | $R_1$ = 0.0341, $wR_2$ = 0.0922                                                                     |
| Largest diff. peak/hole / e Å <sup>-3</sup>      | 0.75/-0.52                                                                                          |



## 5. Selected bond lengths and angles data

**Table S4.** Selected bond lengths (Å) and angles (°) for compound **Y/Eu-MOF**.

| Atom                                                                               | Atom             | Length/Å   |
|------------------------------------------------------------------------------------|------------------|------------|
| Eu1                                                                                | Eu1 <sup>2</sup> | 3.5335(7)  |
| Eu1                                                                                | Y2               | 3.9093(3)  |
| Eu1                                                                                | Y2 <sup>3</sup>  | 3.9093(3)  |
| Eu2                                                                                | Y1               | 3.9093(3)  |
| N1                                                                                 | Eu1              | 2.507(3)   |
| N1                                                                                 | Y1               | 2.507(3)   |
| O1                                                                                 | Eu2              | 2.341(2)   |
| O1                                                                                 | Y1               | 2.512(2)   |
| O1                                                                                 | Eu1              | 2.512(2)   |
| O1                                                                                 | Y2               | 2.341(2)   |
| O2                                                                                 | Y2 <sup>1</sup>  | 2.419(2)   |
| O3                                                                                 | Y2 <sup>1</sup>  | 2.428(2)   |
| O4                                                                                 | Eu1              | 2.3830(19) |
| O4                                                                                 | Eu1 <sup>2</sup> | 2.3831(19) |
| O4                                                                                 | Y2               | 2.321(3)   |
| O4                                                                                 | Eu2              | 2.321(3)   |
| O4                                                                                 | Y1               | 2.3830(19) |
| O5                                                                                 | Y2               | 2.332(3)   |
| O5                                                                                 | Eu2              | 2.332(3)   |
| <sup>1</sup> +y, -x+y, 1-z; <sup>2</sup> +x, +y, 1/2-z; <sup>3</sup> 1-y, +x-y, +z |                  |            |

| Atom             | Atom | Atom             | Angle/°   | Atom            | Atom | Atom             | Angle/°    | Atom            | Atom | Atom             | Angle/°   |
|------------------|------|------------------|-----------|-----------------|------|------------------|------------|-----------------|------|------------------|-----------|
| Eu1 <sup>4</sup> | Eu1  | Y2               | 63.133(5) | O1 <sup>3</sup> | Eu1  | Y2 <sup>2</sup>  | 135.14(5)  | O4              | Eu2  | Y1               | 34.30(4)  |
| Eu2              | O1   | Y1               | 107.28(8) | O1 <sup>3</sup> | Y1   | Eu2              | 97.73(5)   | O4              | Y1   | N1 <sup>3</sup>  | 89.48(8)  |
| Eu2              | O4   | Y1               | 112.41(8) | O1 <sup>4</sup> | Y2   | O1               | 101.22(10) | O4              | Y1   | N1 <sup>2</sup>  | 142.66(9) |
| N1               | Eu1  | N1 <sup>3</sup>  | 81.02(10) | O1 <sup>4</sup> | Y2   | O2 <sup>5</sup>  | 145.35(7)  | O4              | Y1   | N1               | 133.23(9) |
| N1               | Eu1  | O1               | 65.68(8)  | O1 <sup>4</sup> | Y2   | O2 <sup>6</sup>  | 82.25(7)   | O4              | Y1   | O1 <sup>3</sup>  | 74.26(8)  |
| N1               | Eu1  | O1 <sup>2</sup>  | 68.90(8)  | O1 <sup>4</sup> | Y2   | O3 <sup>6</sup>  | 87.22(7)   | O4              | Y1   | O1               | 68.16(8)  |
| N1               | Eu1  | O1 <sup>3</sup>  | 137.57(8) | O1 <sup>4</sup> | Y2   | O3 <sup>5</sup>  | 159.46(7)  | O4              | Y1   | O1 <sup>2</sup>  | 132.92(7) |
| N1               | Eu1  | Eu1 <sup>4</sup> | 131.40(7) | O1 <sup>4</sup> | Y2   | Eu1 <sup>4</sup> | 37.84(5)   | O4              | Y1   | Eu2              | 33.29(6)  |
| N1               | Eu1  | Y2 <sup>2</sup>  | 77.87(6)  | O1 <sup>4</sup> | Y2   | Eu1              | 84.77(5)   | O4 <sup>2</sup> | Eu1  | N1 <sup>2</sup>  | 133.23(9) |
| N1               | Eu1  | Y2               | 100.22(6) | O1 <sup>4</sup> | Eu2  | O1               | 101.22(10) | O4 <sup>2</sup> | Eu1  | N1 <sup>3</sup>  | 142.66(9) |
| N1               | Y1   | N1 <sup>3</sup>  | 81.02(10) | O1 <sup>4</sup> | Eu2  | O2 <sup>6</sup>  | 82.25(7)   | O4 <sup>2</sup> | Eu1  | N1               | 89.48(8)  |
| N1               | Y1   | O1               | 65.68(8)  | O1 <sup>4</sup> | Eu2  | O2 <sup>5</sup>  | 145.35(7)  | O4 <sup>2</sup> | Eu1  | O1 <sup>2</sup>  | 68.16(8)  |
| N1               | Y1   | O1 <sup>2</sup>  | 68.90(8)  | O1 <sup>4</sup> | Eu2  | O3 <sup>5</sup>  | 159.46(7)  | O4 <sup>2</sup> | Eu1  | O1 <sup>3</sup>  | 132.92(7) |
| N1               | Y1   | O1 <sup>3</sup>  | 137.57(8) | O1 <sup>4</sup> | Eu2  | O3 <sup>6</sup>  | 87.22(7)   | O4 <sup>2</sup> | Eu1  | O1               | 74.26(8)  |
| N1               | Y1   | Eu2              | 100.22(6) | O1 <sup>4</sup> | Eu2  | Y1               | 84.77(5)   | O4 <sup>2</sup> | Eu1  | O4               | 71.06(8)  |
| N1 <sup>2</sup>  | Eu1  | N1 <sup>3</sup>  | 81.02(10) | O2 <sup>5</sup> | Y2   | O2 <sup>6</sup>  | 76.55(11)  | O4 <sup>2</sup> | Eu1  | O4 <sup>3</sup>  | 71.06(8)  |
| N1 <sup>2</sup>  | Eu1  | N1               | 81.02(10) | O2 <sup>5</sup> | Y2   | O3 <sup>5</sup>  | 53.83(7)   | O4 <sup>2</sup> | Eu1  | Eu1 <sup>4</sup> | 42.15(5)  |
| N1 <sup>2</sup>  | Eu1  | O1 <sup>3</sup>  | 68.90(8)  | O2 <sup>5</sup> | Y2   | O3 <sup>6</sup>  | 101.49(8)  | O4 <sup>2</sup> | Eu1  | Y2               | 68.37(7)  |
| N1 <sup>2</sup>  | Eu1  | O1               | 137.58(8) | O2 <sup>5</sup> | Y2   | Eu1 <sup>4</sup> | 109.74(5)  | O4 <sup>2</sup> | Eu1  | Y2 <sup>2</sup>  | 33.29(6)  |
| N1 <sup>2</sup>  | Eu1  | O1 <sup>2</sup>  | 65.68(8)  | O2 <sup>5</sup> | Y2   | Eu1              | 77.16(5)   | O4 <sup>2</sup> | Y1   | N1               | 89.48(8)  |
| N1 <sup>2</sup>  | Eu1  | Eu1 <sup>4</sup> | 131.40(7) | O2 <sup>5</sup> | Eu2  | O2 <sup>6</sup>  | 76.55(11)  | O4 <sup>2</sup> | Y1   | N1 <sup>3</sup>  | 142.66(9) |
| N1 <sup>2</sup>  | Eu1  | Y2 <sup>2</sup>  | 100.22(6) | O2 <sup>5</sup> | Eu2  | O3 <sup>5</sup>  | 53.83(7)   | O4 <sup>2</sup> | Y1   | N1 <sup>2</sup>  | 133.23(9) |
| N1 <sup>2</sup>  | Eu1  | Y2               | 158.35(6) | O2 <sup>5</sup> | Eu2  | O3 <sup>6</sup>  | 101.49(8)  | O4 <sup>2</sup> | Y1   | O1               | 74.26(8)  |
| N1 <sup>2</sup>  | Y1   | N1 <sup>3</sup>  | 81.02(10) | O2 <sup>5</sup> | Eu2  | Y1               | 77.16(5)   | O4 <sup>2</sup> | Y1   | O1 <sup>2</sup>  | 68.16(8)  |

|                 |     |                  |            |                 |     |                  |           |                 |     |                  |           |
|-----------------|-----|------------------|------------|-----------------|-----|------------------|-----------|-----------------|-----|------------------|-----------|
| N1 <sup>2</sup> | Y1  | N1               | 81.02(10)  | O2 <sup>6</sup> | Y2  | O3 <sup>6</sup>  | 53.83(7)  | O4 <sup>2</sup> | Y1  | O1 <sup>3</sup>  | 132.92(7) |
| N1 <sup>2</sup> | Y1  | O1 <sup>3</sup>  | 68.90(8)   | O2 <sup>6</sup> | Y2  | O3 <sup>5</sup>  | 101.49(8) | O4 <sup>2</sup> | Y1  | O4 <sup>3</sup>  | 71.06(8)  |
| N1 <sup>2</sup> | Y1  | O1 <sup>2</sup>  | 65.68(8)   | O2 <sup>6</sup> | Y2  | Eu1 <sup>4</sup> | 77.16(5)  | O4 <sup>2</sup> | Y1  | O4               | 71.06(8)  |
| N1 <sup>2</sup> | Y1  | O1               | 137.58(8)  | O2 <sup>6</sup> | Y2  | Eu1              | 109.74(5) | O4 <sup>2</sup> | Y1  | Eu2              | 68.37(7)  |
| N1 <sup>2</sup> | Y1  | Eu2              | 158.35(6)  | O2 <sup>6</sup> | Eu2 | O3 <sup>5</sup>  | 101.49(8) | O4 <sup>3</sup> | Eu1 | N1 <sup>3</sup>  | 133.23(9) |
| N1 <sup>3</sup> | Eu1 | O1 <sup>3</sup>  | 65.68(8)   | O2 <sup>6</sup> | Eu2 | O3 <sup>6</sup>  | 53.83(7)  | O4 <sup>3</sup> | Eu1 | N1               | 142.66(9) |
| N1 <sup>3</sup> | Eu1 | O1               | 68.90(8)   | O2 <sup>6</sup> | Eu2 | Y1               | 109.74(5) | O4 <sup>3</sup> | Eu1 | N1 <sup>2</sup>  | 89.48(9)  |
| N1 <sup>3</sup> | Eu1 | O1 <sup>2</sup>  | 137.58(8)  | O3 <sup>5</sup> | Y2  | Eu1              | 112.25(5) | O4 <sup>3</sup> | Eu1 | O1 <sup>2</sup>  | 74.26(8)  |
| N1 <sup>3</sup> | Eu1 | Eu1 <sup>4</sup> | 131.40(7)  | O3 <sup>5</sup> | Y2  | Eu1 <sup>4</sup> | 162.69(5) | O4 <sup>3</sup> | Eu1 | O1               | 132.92(7) |
| N1 <sup>3</sup> | Eu1 | Y2               | 77.86(6)   | O3 <sup>5</sup> | Eu2 | Y1               | 112.25(5) | O4 <sup>3</sup> | Eu1 | O1 <sup>3</sup>  | 68.16(8)  |
| N1 <sup>3</sup> | Eu1 | Y2 <sup>2</sup>  | 158.35(6)  | O3 <sup>6</sup> | Y2  | O3 <sup>5</sup>  | 79.17(11) | O4 <sup>3</sup> | Eu1 | O4               | 71.07(8)  |
| N1 <sup>3</sup> | Y1  | O1               | 68.90(8)   | O3 <sup>6</sup> | Y2  | Eu1              | 162.69(5) | O4 <sup>3</sup> | Eu1 | Eu1 <sup>4</sup> | 42.15(5)  |
| N1 <sup>3</sup> | Y1  | O1 <sup>3</sup>  | 65.68(8)   | O3 <sup>6</sup> | Y2  | Eu1 <sup>4</sup> | 112.25(5) | O4 <sup>3</sup> | Eu1 | Y2 <sup>2</sup>  | 68.37(7)  |
| N1 <sup>3</sup> | Y1  | O1 <sup>2</sup>  | 137.58(8)  | O3 <sup>6</sup> | Eu2 | O3 <sup>5</sup>  | 79.17(11) | O4 <sup>3</sup> | Eu1 | Y2               | 101.50(6) |
| N1 <sup>3</sup> | Y1  | Eu2              | 77.86(6)   | O3 <sup>6</sup> | Eu2 | Y1               | 162.69(5) | O4 <sup>3</sup> | Y1  | N1 <sup>2</sup>  | 89.48(9)  |
| O1              | Eu1 | O1 <sup>3</sup>  | 119.971(3) | O4              | Eu1 | N1 <sup>3</sup>  | 89.48(8)  | O4 <sup>3</sup> | Y1  | N1               | 142.66(9) |
| O1              | Eu1 | Eu1 <sup>4</sup> | 90.97(5)   | O4              | Eu1 | N1               | 133.23(9) | O4 <sup>3</sup> | Y1  | N1 <sup>3</sup>  | 133.23(9) |
| O1              | Eu1 | Y2 <sup>2</sup>  | 97.73(5)   | O4              | Eu1 | N1 <sup>2</sup>  | 142.66(9) | O4 <sup>3</sup> | Y1  | O1 <sup>3</sup>  | 68.16(8)  |
| O1              | Eu1 | Y2               | 34.88(5)   | O4              | Eu1 | O1               | 68.16(8)  | O4 <sup>3</sup> | Y1  | O1               | 132.92(7) |
| O1              | Y2  | O2 <sup>6</sup>  | 145.35(7)  | O4              | Eu1 | O1 <sup>2</sup>  | 132.92(7) | O4 <sup>3</sup> | Y1  | O1 <sup>2</sup>  | 74.26(8)  |
| O1              | Y2  | O2 <sup>5</sup>  | 82.25(7)   | O4              | Eu1 | O1 <sup>3</sup>  | 74.26(8)  | O4 <sup>3</sup> | Y1  | O4               | 71.07(8)  |
| O1              | Y2  | O3 <sup>6</sup>  | 159.46(7)  | O4              | Eu1 | Eu1 <sup>4</sup> | 42.15(5)  | O4 <sup>3</sup> | Y1  | Eu2              | 101.50(6) |
| O1              | Y2  | O3 <sup>5</sup>  | 87.22(7)   | O4              | Eu1 | Y2               | 33.29(6)  | O5              | Y2  | O1 <sup>4</sup>  | 79.84(7)  |
| O1              | Y2  | Eu1              | 37.84(5)   | O4              | Eu1 | Y2 <sup>2</sup>  | 101.50(6) | O5              | Y2  | O1               | 79.84(7)  |
| O1              | Y2  | Eu1 <sup>4</sup> | 84.77(5)   | O4              | Y2  | O1               | 72.14(7)  | O5              | Y2  | O2 <sup>6</sup>  | 134.13(7) |

|                                                                                                                                                                      |     |                  |            |    |     |                  |            |                 |     |                  |            |
|----------------------------------------------------------------------------------------------------------------------------------------------------------------------|-----|------------------|------------|----|-----|------------------|------------|-----------------|-----|------------------|------------|
| O1                                                                                                                                                                   | Eu2 | O2 <sup>5</sup>  | 82.25(7)   | O4 | Y2  | O1 <sup>4</sup>  | 72.14(7)   | O5              | Y2  | O2 <sup>5</sup>  | 134.13(7)  |
| O1                                                                                                                                                                   | Eu2 | O2 <sup>6</sup>  | 145.35(7)  | O4 | Y2  | O2 <sup>5</sup>  | 76.39(8)   | O5              | Y2  | O3 <sup>6</sup>  | 83.34(9)   |
| O1                                                                                                                                                                   | Eu2 | O3 <sup>6</sup>  | 159.46(7)  | O4 | Y2  | O2 <sup>6</sup>  | 76.39(8)   | O5              | Y2  | O3 <sup>5</sup>  | 83.34(9)   |
| O1                                                                                                                                                                   | Eu2 | O3 <sup>5</sup>  | 87.22(7)   | O4 | Y2  | O3 <sup>6</sup>  | 128.40(7)  | O5              | Y2  | Eu1              | 110.21(8)  |
| O1                                                                                                                                                                   | Eu2 | Y1               | 37.84(5)   | O4 | Y2  | O3 <sup>5</sup>  | 128.40(7)  | O5              | Y2  | Eu1 <sup>4</sup> | 110.21(8)  |
| O1                                                                                                                                                                   | Y1  | O1 <sup>3</sup>  | 119.971(3) | O4 | Y2  | O5               | 134.95(11) | O5              | Eu2 | O1 <sup>4</sup>  | 79.84(7)   |
| O1                                                                                                                                                                   | Y1  | Eu2              | 34.88(5)   | O4 | Y2  | Eu1 <sup>4</sup> | 34.30(4)   | O5              | Eu2 | O1               | 79.84(7)   |
| O1 <sup>2</sup>                                                                                                                                                      | Eu1 | O1               | 119.972(3) | O4 | Y2  | Eu1              | 34.30(4)   | O5              | Eu2 | O2 <sup>6</sup>  | 134.13(7)  |
| O1 <sup>2</sup>                                                                                                                                                      | Eu1 | O1 <sup>3</sup>  | 119.971(3) | O4 | Eu2 | O1 <sup>4</sup>  | 72.14(7)   | O5              | Eu2 | O2 <sup>5</sup>  | 134.13(7)  |
| O1 <sup>2</sup>                                                                                                                                                      | Eu1 | Eu1 <sup>4</sup> | 90.97(5)   | O4 | Eu2 | O1               | 72.14(7)   | O5              | Eu2 | O3 <sup>6</sup>  | 83.34(9)   |
| O1 <sup>2</sup>                                                                                                                                                      | Eu1 | Y2 <sup>2</sup>  | 34.88(5)   | O4 | Eu2 | O2 <sup>6</sup>  | 76.39(8)   | O5              | Eu2 | O3 <sup>5</sup>  | 83.34(9)   |
| O1 <sup>2</sup>                                                                                                                                                      | Eu1 | Y2               | 135.14(5)  | O4 | Eu2 | O2 <sup>5</sup>  | 76.39(8)   | O5              | Eu2 | Y1               | 110.21(8)  |
| O1 <sup>2</sup>                                                                                                                                                      | Y1  | O1 <sup>3</sup>  | 119.971(3) | O4 | Eu2 | O3 <sup>5</sup>  | 128.40(7)  | Y2              | O1  | Eu1              | 107.28(8)  |
| O1 <sup>2</sup>                                                                                                                                                      | Y1  | O1               | 119.972(3) | O4 | Eu2 | O3 <sup>6</sup>  | 128.40(7)  | Y2              | O4  | Eu1              | 112.41(8)  |
| O1 <sup>2</sup>                                                                                                                                                      | Y1  | Eu2              | 135.14(5)  | O4 | Eu2 | O5               | 134.95(11) | Y2 <sup>2</sup> | Eu1 | Y2               | 101.165(7) |
| O1 <sup>3</sup>                                                                                                                                                      | Eu1 | Eu1 <sup>4</sup> | 90.97(5)   |    |     |                  |            |                 |     |                  |            |
| O1 <sup>3</sup>                                                                                                                                                      | Eu1 | Y2               | 97.73(5)   |    |     |                  |            |                 |     |                  |            |
| <hr/>                                                                                                                                                                |     |                  |            |    |     |                  |            |                 |     |                  |            |
| <sup>1</sup> +y,-x+y,1-z; <sup>2</sup> 1-y,+x-y,+z; <sup>3</sup> 1+y-x,1-x,+z; <sup>4</sup> +x,+y,1/2-z; <sup>5</sup> -y+x,+x,1-z; <sup>6</sup> -y+x,+x,-1/2+z <hr/> |     |                  |            |    |     |                  |            |                 |     |                  |            |

## 6. Powder X-ray diffraction analysis

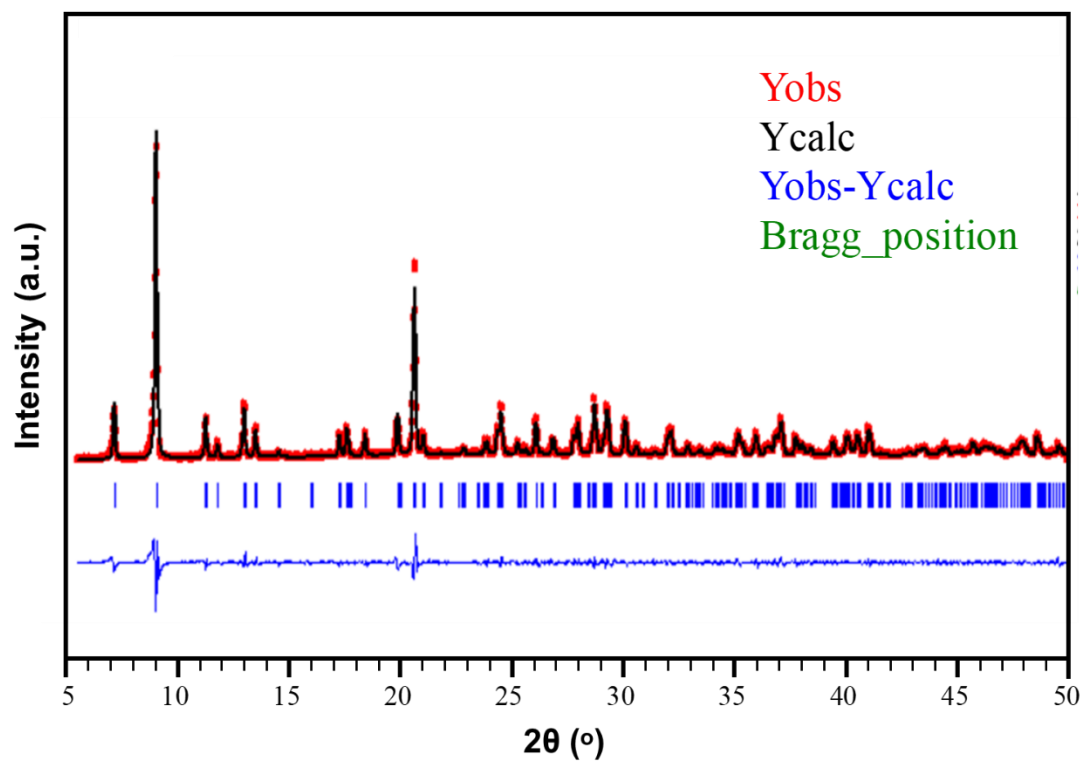

**Figure S1.** Figure of the pattern matching analysis and experimental <sup>PXRD</sup> for **Y/Eu-MOF**.

## 7. FTIR analysis of Ligand and Catalyst

FTIR spectrum of **Y/Eu-MOF** display a narrow peak at around  $3617\text{ cm}^{-1}$  attributed to the N–H stretching vibration of the amine group of 3-amino-4-hydroxybenzoate ligand. Also, an intense and broad band attributable to O–H bond of free ligand along with a set of weak bands between  $3325$  and  $2917\text{ cm}^{-1}$  corresponding to the C–H vibrations of the aromatic ring of the 3-amino-4-hydroxybenzoate ligand are visible in the spectrum. Peaks in  $1683$ – $1408\text{ cm}^{-1}$  region are associated with asymmetric stretching vibrations of the carboxylate groups and the aromatic C–C and C–N bonds. The group of signals at lower range,  $1390$ – $1263\text{ cm}^{-1}$ , can be linked to symmetric stretching vibrations of the carboxylate groups. Remaining bands found at lower frequencies originated by distortions in the aromatic and carboxylate group of the ligand. Note that vibrational bands M–O and M–N bonds are observed below  $660\text{ cm}^{-1}$ .

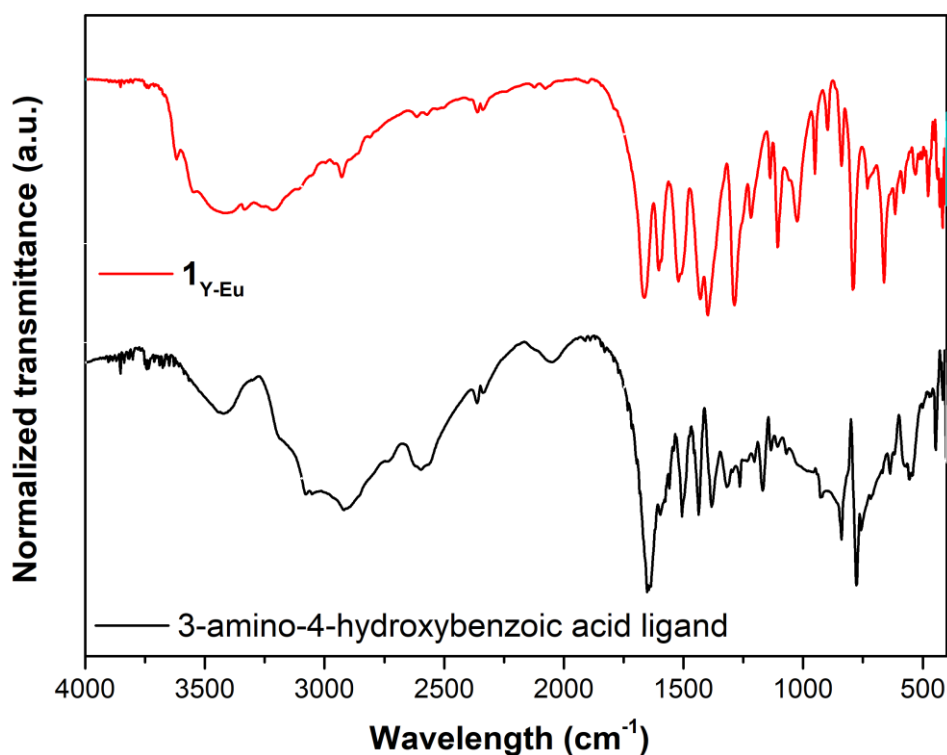

**Figure S2.** Figure of the infrared spectra of the ligand and **Y/Eu-MOF**.

## 8. Continuous Shape Measurements

**Table S5.** Table of the continuous Shape Measurements for the  $\text{MN}_3\text{O}_6$  coordination environment.

|          |        |                                    |
|----------|--------|------------------------------------|
| EP-9     | 1 D9h  | Enneagon                           |
| OPY-9    | 2 C8v  | Octagonal pyramid                  |
| HBPY-9   | 3 D7h  | Heptagonal bipyramid               |
| JTC-9    | 4 C3v  | Johnson triangular cupola J3       |
| JCCU-9   | 5 C4v  | Capped cube J8                     |
| CCU-9    | 6 C4v  | Spherical-relaxed capped cube      |
| JCSAPR-9 | 7 C4v  | Capped square antiprism J10        |
| CSAPR-9  | 8 C4v  | Spherical capped square antiprism  |
| JTCTPR-9 | 9 D3h  | Tricapped trigonal prism J51       |
| TCTPR-9  | 10 D3h | Spherical tricapped trigonal prism |
| JTDIC-9  | 11 C3v | Tridiminished icosahedron J63      |
| HH-9     | 12 C2v | Hula-hoop                          |
| MFF-9    | 13 Cs  | Muffin                             |

| Complex   | JCSAPR-9 | CSAPR-9 | JTCTPR-9 | TCTPR-9      | MFF-9 |
|-----------|----------|---------|----------|--------------|-------|
| <b>M1</b> | 2.342    | 1.370   | 1.958    | <b>0.666</b> | 2.050 |

**Table S6.** Table of the continuous Shape Measurements for the MO<sub>8</sub> coordination environment.

|          |        |                                                |
|----------|--------|------------------------------------------------|
| OP-8     | 1 D8h  | Octagon                                        |
| HPY-8    | 2 C7v  | Heptagonal pyramid                             |
| HBPY-8   | 3 D6h  | Hexagonal bipyramid                            |
| CU-8     | 4 Oh   | Cube                                           |
| SAPR-8   | 5 D4d  | Square antiprism                               |
| TDD-8    | 6 D2d  | Triangular dodecahedron                        |
| JGBF-8   | 7 D2d  | Johnson - Gyrobifastigium (J26)                |
| JETBPY-8 | 8 D3h  | Johnson - Elongated triangular bipyramid (J14) |
| JBTP-8   | 9 C2v  | Johnson - Biaugmented trigonal prism (J50)     |
| BTPR-8   | 10 C2v | Biaugmented trigonal prism                     |
| JSD-8    | 11 D2d | Snub disphenoid (J84)                          |
| TT-8     | 12 Td  | Triakis tetrahedron                            |
| ETBPY-8  | 13 D3h | Elongated trigonal bipyramid                   |

| Complex   | SAPR-8 | TDD-8        | JBTPR-8 | BTPR-8 | JSD-8 |
|-----------|--------|--------------|---------|--------|-------|
| <b>M2</b> | 2.703  | <b>2.693</b> | 3.668   | 3.234  | 5.526 |



## 9. Scanning Electron Microscopy

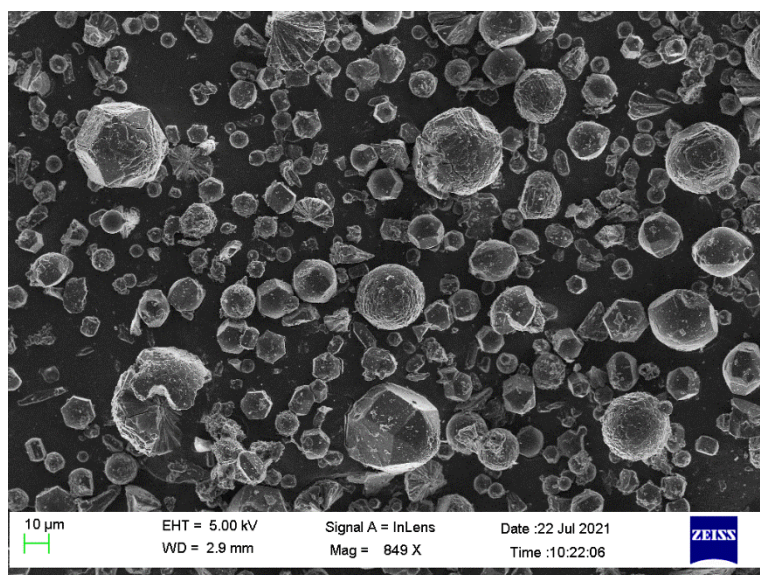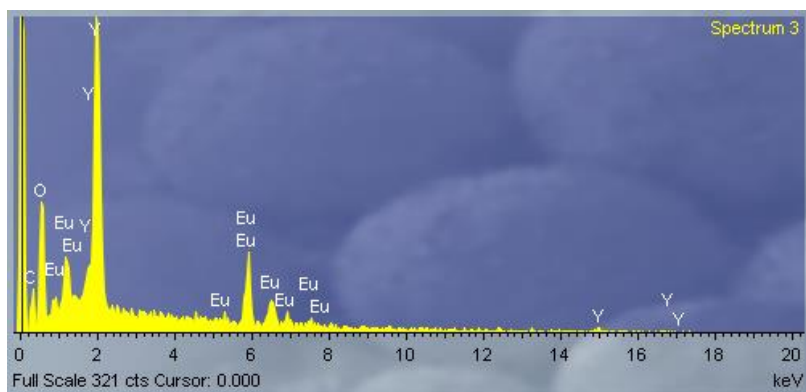

| Spectrum          | Weight%  | Weight%  | Weight%  | Weight%<br>Total | Atomic%  | Atomic%  | Atomic%  |
|-------------------|----------|----------|----------|------------------|----------|----------|----------|
|                   | O        | Y        | Eu       |                  | O        | Y        | Eu       |
|                   | K_SERIES | L_SERIES | L_SERIES |                  | K_SERIES | L_SERIES | L_SERIES |
| <b>Spectrum 3</b> | 35.707   | 41.004   | 21.526   | 98.237           | 78.733   | 16.27    | 4.997    |

**Figure S3.** SEM and EDS mapping of bulk material of **Y/Eu-MOF**.

## 10. Particle size distribution of catalyst

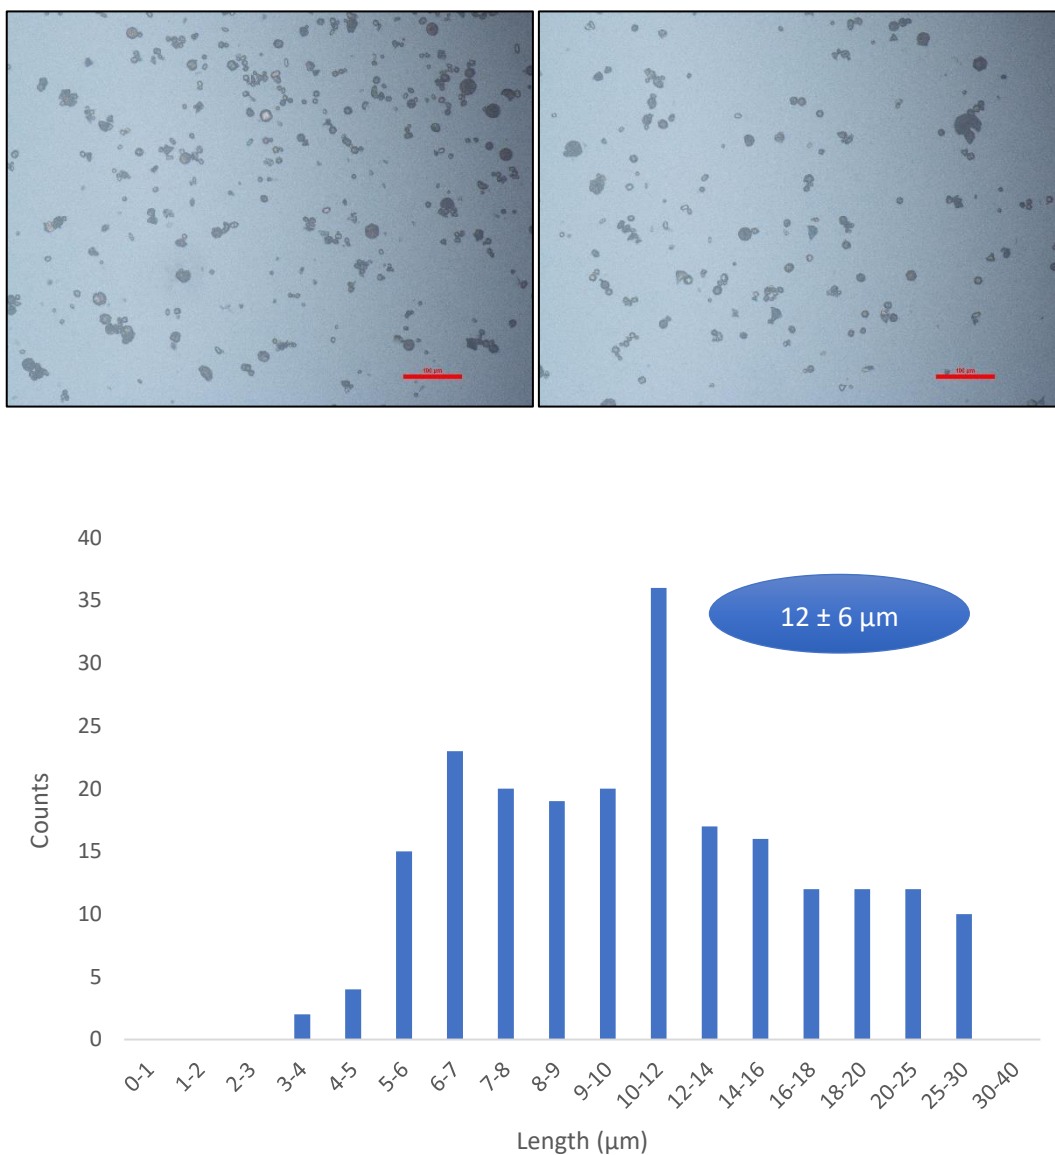

**Figure S4.** Images and particle size distribution (an overall of 250 particles) in the deposited fraction of **Y/Eu-MOF** catalyst non-suspended in water (about a 68 % of the total amount), determined from optical microscope images.

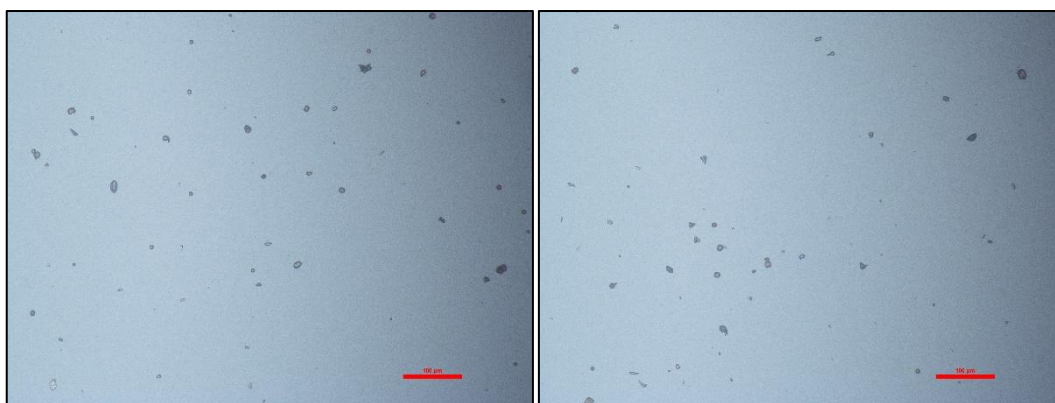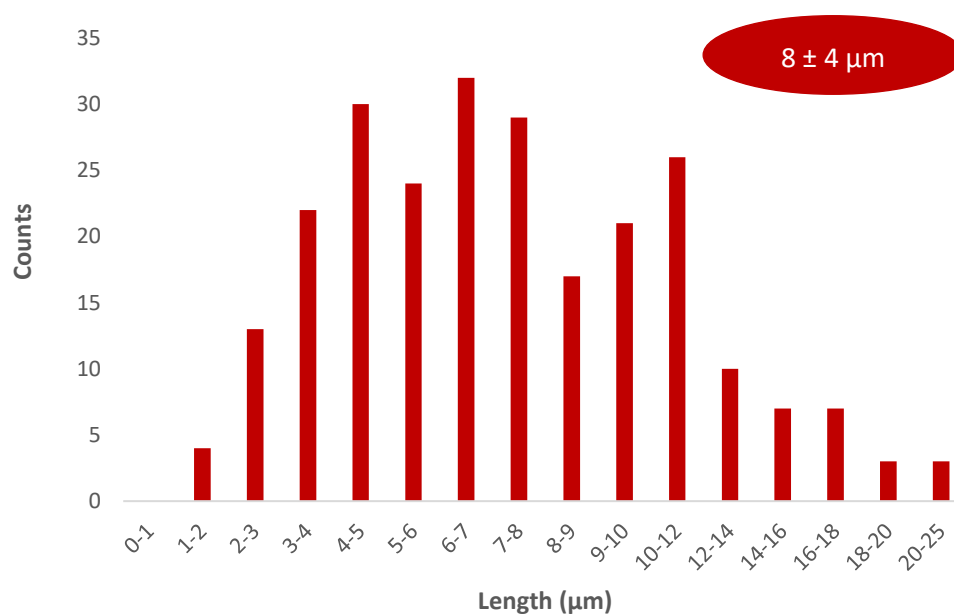

**Figure S5.** Images and particle size distribution (an overall of 250 particles) of **Y/Eu-MOF** crystals in the fraction steadily suspended in water (about a 32 % of the total amount), determined from optical microscope images.

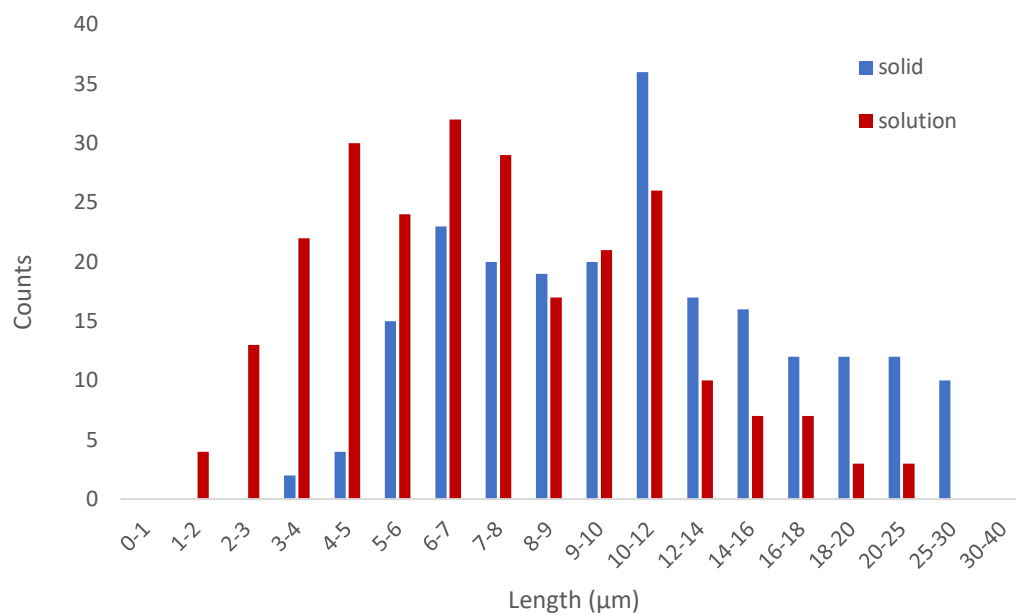

**Figure S6.** Comparison of the particle size distribution of **Y/Eu-MOF** in the fraction steadily suspended in water and the non-suspended, determined from optical microscope images.

## 11. Study of $\zeta$ -potential at different pH values

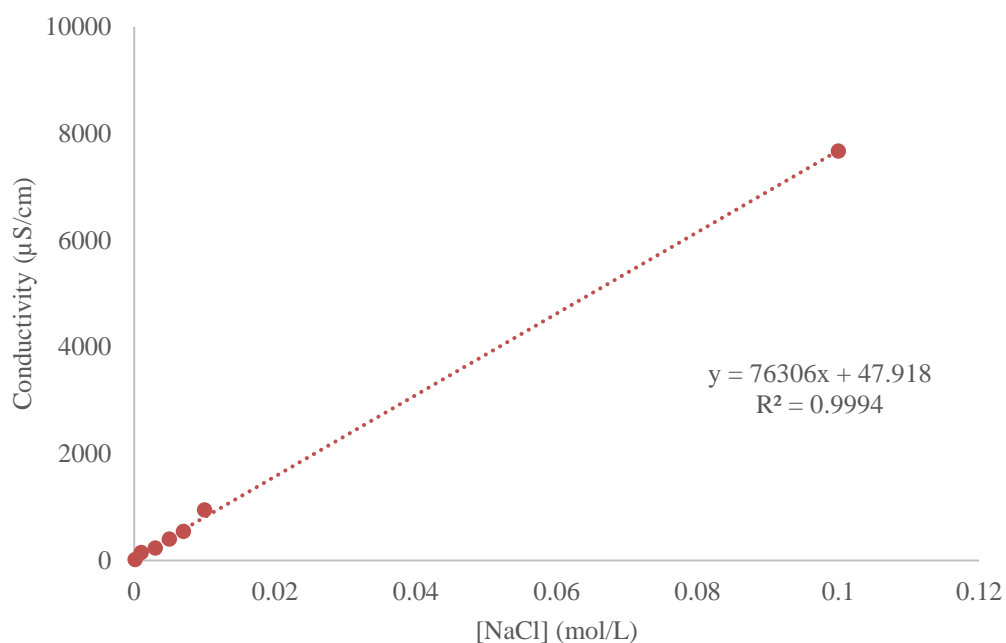

**Figure S7.** Calibration line of Conductivity ( $\mu\text{S/cm}$ ) vs [NaCl] (mol/L).

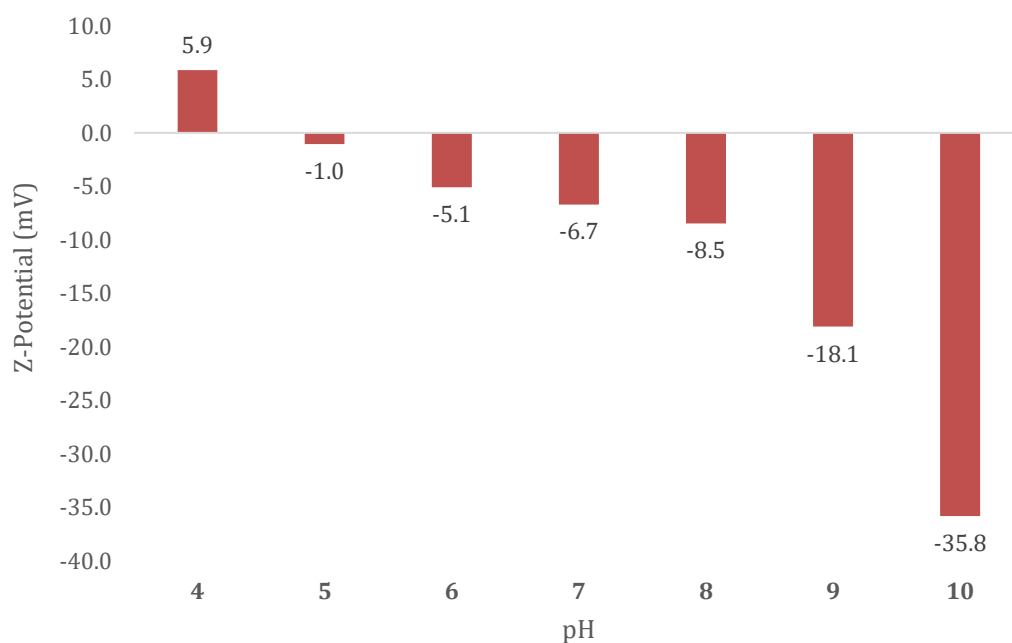

**Figure S8.**  $\zeta$ -potential (mV) dependence with the pH of the **Y/Eu-MOF**. All the measurements were performed with constant conductivity of  $330 \mu\text{S/cm}$ .

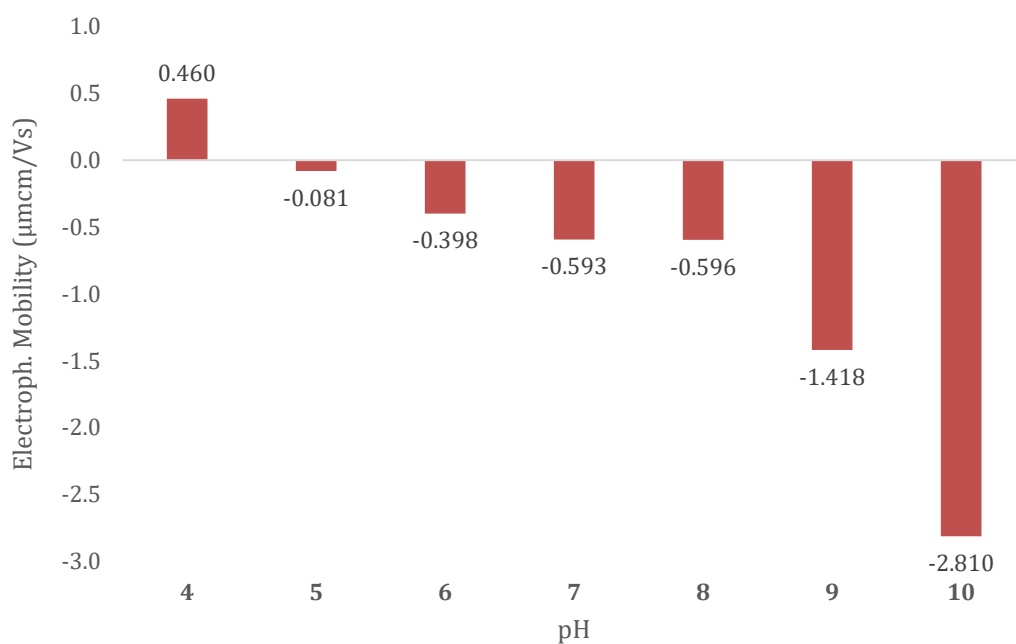

**Figure S9.** Electrophoretic mobility ( $\mu\text{m}\cdot\text{cm}/\text{V}\cdot\text{s}$ ) dependence with the pH of the **Y/Eu-MOF**. All the measurements were performed with constant conductivity of  $330\ \mu\text{S}/\text{cm}$ .

**Table S7.** Electrophoretic mobility and  $\zeta$ -potential dependence with the pH of the **Y/Eu-MOFs** particles dispersed in water. Conductivity fixed at  $330\ \mu\text{S}/\text{cm}$ .

| Y/Eu-MOF |                                               |                         |
|----------|-----------------------------------------------|-------------------------|
| pH       | Electroph. Mob. ( $\mu\text{mcm}/\text{Vs}$ ) | $\zeta$ -potential (mV) |
| 4        | $0.460 \pm 0.032$                             | $5.9 \pm 0.4$           |
| 5        | $-0.081 \pm 0.025$                            | $-1.0 \pm 0.3$          |
| 6        | $-0.398 \pm 0.041$                            | $-5.1 \pm 0.5$          |
| 7        | $-0.593 \pm 0.049$                            | $6.7 \pm 0.6$           |
| 8        | $-0.596 \pm 0.056$                            | $-8.5 \pm 0.4$          |
| 9        | $-1.418 \pm 0.026$                            | $18.1 \pm 0.3$          |
| 10       | $-2.252 \pm 0.035$                            | $-35.8 \pm 0.5$         |

## 12. Optimization of the hydroboration reaction conditions.

**Table S8.** Optimization of the reaction conditions in the hydroboration reaction.<sup>a</sup>

| <div style="display: flex; align-items: center; justify-content: space-around;"> <div style="text-align: center;"> 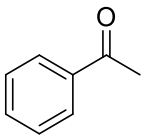 </div> <div>+</div> <div style="text-align: center;">             HBPIn         </div> <div style="text-align: center;"> <math>\xrightarrow[\text{2) Et}_2\text{O (0.5 mL), NaOH (0.5 mL), RT, 24h}]{\text{1) Y/Eu-MOF (x mol\%), Solvent, N}_2 \text{ atm, RT, 24h}}</math> </div> <div style="text-align: center;">  <br/> <b>4a</b> </div> </div> |                   |                    |                             |
|----------------------------------------------------------------------------------------------------------------------------------------------------------------------------------------------------------------------------------------------------------------------------------------------------------------------------------------------------------------------------------------------------------------------------------------------------------------------------------------------------------------------------------------------------------------------------------------------------------------------------------------------|-------------------|--------------------|-----------------------------|
| Entry                                                                                                                                                                                                                                                                                                                                                                                                                                                                                                                                                                                                                                        | Y/Eu-MOF (x mol%) | Solvent            | Conversion (%) <sup>b</sup> |
| 1                                                                                                                                                                                                                                                                                                                                                                                                                                                                                                                                                                                                                                            | 0.35              | -                  | 71                          |
| 2                                                                                                                                                                                                                                                                                                                                                                                                                                                                                                                                                                                                                                            | 0.35              | PhMe               | 13                          |
| 3                                                                                                                                                                                                                                                                                                                                                                                                                                                                                                                                                                                                                                            | 0.35              | THF                | 25                          |
| 4                                                                                                                                                                                                                                                                                                                                                                                                                                                                                                                                                                                                                                            | 0.35              | DCM                | 9                           |
| 5                                                                                                                                                                                                                                                                                                                                                                                                                                                                                                                                                                                                                                            | 0.35              | CH <sub>3</sub> CN | 4                           |
| 6                                                                                                                                                                                                                                                                                                                                                                                                                                                                                                                                                                                                                                            | 0.5               | -                  | 95                          |
| 7                                                                                                                                                                                                                                                                                                                                                                                                                                                                                                                                                                                                                                            | 0.75              | -                  | 95                          |
| 8                                                                                                                                                                                                                                                                                                                                                                                                                                                                                                                                                                                                                                            | 1.1               | -                  | 92                          |

<sup>a</sup> Reaction carried out using acetophenone (28  $\mu$ L, 0.25 mmol), HBPIn (40  $\mu$ L, 0.275 mmol) in 0.5 mL of the corresponding solvent at room temperature and under nitrogen inert atmosphere during 24h. <sup>b</sup> Conversions (relative to acetophenone) determined by <sup>1</sup>H NMR of the reaction crude.

### 13. Characterization Data of Products

**2-Phenyl-2-((trimethylsilyl)oxy)acetonitrile (2a).** This product has been previously reported.<sup>7</sup> <sup>1</sup>H NMR (300.13 MHz, CDCl<sub>3</sub>): δ 7.50–7.35 (m, 5H, ArH), 5.50 (s, 1H, CHCN), 0.23 (s, 9H, TMS) ppm. <sup>13</sup>C NMR (75.48 MHz, CDCl<sub>3</sub>): δ 136.2 (C<sub>ipso</sub>), 129.3 (ArCH), 128.9 (ArCH), 126.3 (ArCH), 119.1 (CN), 63.6 (CH), -0.29 (TMS) ppm.

**2-(4-Methoxyphenyl)-2-((trimethylsilyl)oxy)acetonitrile (2b).** This product has been previously reported.<sup>8</sup> <sup>1</sup>H NMR (300.13 MHz, CDCl<sub>3</sub>): δ 7.38 (d, *J* = 8.6 Hz, 2H, ArH), 6.92 (d, *J* = 8.6 Hz, 2H, ArH), 5.43 (s, 1H, CHCN), 3.82 (s, 3H, OMe), -0.21 (s, 9H, TMS) ppm. <sup>13</sup>C NMR (75.48 MHz, CDCl<sub>3</sub>): δ 160.3 (C<sub>ipso</sub>), 128.3 (C<sub>ipso</sub>), 127.9 (ArCH), 119.3 (CN), 114.2 (ArCH), 63.3 (CH), 55.3 (OCH<sub>3</sub>), -0.24 (TMS) ppm.

**2-(4-Chlorophenyl)-2-((trimethylsilyl)oxy)acetonitrile (2c).** This product has been previously reported.<sup>9</sup> <sup>1</sup>H NMR (300.13 MHz, CDCl<sub>3</sub>): δ 7.45–7.40 (m, 5H, ArH), 5.49 (s, 1H, CHCN), 0.26 (s, 9H, TMS) ppm. <sup>13</sup>C NMR (75.48 MHz, CDCl<sub>3</sub>): δ 135.3 (C<sub>ipso</sub>), 134.8 (C<sub>ipso</sub>), 129.1 (ArCH), 127.7 (ArCH), 118.8 (CN), 63.0 (CH), -0.30 (TMS) ppm.

**2-(Pyridin-2-yl)-2-((trimethylsilyl)oxy)acetonitrile (2d).** This product has been previously reported.<sup>10</sup> <sup>1</sup>H NMR (300.13 MHz, CDCl<sub>3</sub>): δ 8.60–8.55 (m, 1H, ArH), 7.79 (dt, *J* = 7.7, 1.7 Hz, 1H, ArH), 7.59 (d, *J* = 7.7 Hz, 1H, ArH), 7.35–7.25 (m, 1H, ArH), 5.58 (s, 1H, CHCN), 0.26 (s, 9H, TMS) ppm. <sup>13</sup>C NMR (75.48 MHz, CDCl<sub>3</sub>): δ 155.4 (C<sub>ipso</sub>), 149.3 (ArCH), 137.5 (ArCH), 124.0 (ArCH), 120.5 (ArCH), 118.6 (CN), 65.1 (CH), -0.37 (TMS) ppm.

**2-((Trimethylsilyl)oxy)butanenitrile (2e).** This product has been previously reported.<sup>11</sup> <sup>1</sup>H NMR (300.13 MHz, CDCl<sub>3</sub>): δ 4.34 (t, *J* = 6.3 Hz, 1H, CH), 1.85–1.75 (m, 2H, CH<sub>2</sub>), 1.04 (t, *J* = 7.4 Hz, 3H, CH<sub>3</sub>), 0.21 (s, 9H, CH<sub>3</sub> x 3) ppm. <sup>13</sup>C NMR (75.48 MHz, CDCl<sub>3</sub>): δ 119.9 (CN), 62.7 (CH), 29.6 (CH<sub>2</sub>), 8.9 (CH<sub>3</sub>), 0.4 (TMS) ppm.

**2-Phenyl-2-((trimethylsilyl)oxy)propanenitrile (3a).** This product has been previously reported.<sup>12</sup> <sup>1</sup>H NMR (300.13 MHz, CDCl<sub>3</sub>): δ 7.60–7.50 (m, 2H, ArH), 7.45–7.30 (m, 3H, ArH), 1.86 (s, 3H, CH<sub>3</sub>), 0.18 (s, 9H, TMS) ppm. <sup>13</sup>C NMR (75.48 MHz, CDCl<sub>3</sub>): δ 142.0 (C<sub>ipso</sub>), 128.68 (ArCH), 128.66 (ArCH), 124.6 (ArCH), 121.6 (CN), 71.6 (C), 33.5 (CH<sub>3</sub>), 1.03 (TMS) ppm.

**2-(4-Methoxyphenyl)-2-((trimethylsilyl)oxy)propanenitrile (3b).** This product has been previously reported.<sup>13</sup> <sup>1</sup>H NMR (300.13 MHz, CDCl<sub>3</sub>): δ 7.46 (d, *J* = 8.7 Hz, 2H, ArH), 6.91 (d, *J* = 8.7 Hz, 2H, ArH), 3.82 (s, 3H, OMe), 1.85 (s, 3H, CH<sub>3</sub>), 0.16 (s, 9H, TMS) ppm. <sup>13</sup>C NMR (75.48 MHz, CDCl<sub>3</sub>): δ 159.7 (C<sub>ipso</sub>), 133.9 (C<sub>ipso</sub>), 126.0 (ArCH), 121.7 (CN), 113.8 (ArCH), 71.2 (C), 55.2 (OCH<sub>3</sub>), 33.3 (CH<sub>3</sub>), 1.00 (TMS) ppm.

**2-(4-Chlorophenyl)-2-((trimethylsilyl)oxy)propanenitrile (3c).** This product has been previously reported.<sup>13</sup> <sup>1</sup>H NMR (300.13 MHz, CDCl<sub>3</sub>): δ 7.48 (d, *J* = 8.5 Hz, 2H, ArH), 7.37 (d, *J* = 8.5 Hz, 2H, ArH), 1.83 (s, 3H, CH<sub>3</sub>), 0.19 (s, 9H, TMS) ppm. <sup>13</sup>C NMR (75.48



MHz, CDCl<sub>3</sub>):  $\delta$  140.6 (*C*<sub>ipso</sub>), 134.5 (*C*<sub>ipso</sub>), 128.8 (ArCH), 126.0 (ArCH), 121.2 (CN), 71.0 (C), 33.4 (CH<sub>3</sub>), 1.00 (TMS) ppm.

**2-(2,4-Difluorophenyl)-2-((trimethylsilyl)oxy)propanenitrile (3d).** This product has been previously reported.<sup>15</sup> <sup>1</sup>H NMR (500.13 MHz, CDCl<sub>3</sub>):  $\delta$  7.56 (td, *J* = 8.8, 6.4 Hz, 1H, ArH), 6.95–6.90 (m, 1H, ArH), 6.86 (ddd, *J* = 11.1, 8.8, 2.5 Hz, 1H, ArH), 1.92 (s, 3H, CH<sub>3</sub>), 0.27 (s, 9H, TMS) ppm. <sup>13</sup>C NMR (125.77 MHz, CDCl<sub>3</sub>):  $\delta$  163.2 (dd, *J* = 250.8, 12.0 Hz, *C*<sub>ipso</sub>-F), 159.4 (dd, *J* = 252.5, 12.0 Hz, *C*<sub>ipso</sub>-F), 127.8 (dd, *J* = 9.7, 4.3 Hz, ArCH), 125.0 (dd, *J* = 11.2, 3.9 Hz, *C*<sub>ipso</sub>-F), 120.4 (CN), 111.2 (d, *J* = 21.2 Hz, ArCH), 104.9 (t, *J* = 25.6 Hz, ArCH), 68.0 (d, *J* = 2.0 Hz, C), 30.8 (d, *J* = 2.9 Hz, CH<sub>3</sub>), 1.08 (TMS) ppm.

**2-(Pyridin-2-yl)-2-((trimethylsilyl)oxy)propanenitrile (3e).** This product has been previously reported.<sup>14</sup> <sup>1</sup>H NMR (300.13 MHz, CDCl<sub>3</sub>):  $\delta$  8.62 (d, *J* = 4.7 Hz, 1H, ArH), 7.77 (t, *J* = 7.8 Hz, 1H, ArH), 7.60 (d, *J* = 7.8 Hz, 1H, ArH), 7.30–7.25 (m, 1H, ArH), 1.93 (s, 3H, CH<sub>3</sub>), 0.26 (s, 9H, TMS) ppm. <sup>13</sup>C NMR (75.48 MHz, CDCl<sub>3</sub>):  $\delta$  160.0 (*C*<sub>ipso</sub>), 149.0 (ArCH), 137.2 (ArCH), 123.4 (ArCH), 121.3 (CN), 118.9 (ArCH), 72.9 (C), 31.2 (CH<sub>3</sub>), 1.06 (TMS) ppm.

**2-Methyl-2-((trimethylsilyl)oxy)butanenitrile (3f).** This product has been previously reported.<sup>13</sup> <sup>1</sup>H NMR (300.13 MHz, CDCl<sub>3</sub>):  $\delta$  1.85–1.65 (m, 2H, CH<sub>2</sub>), 1.55 (s, 3H, CH<sub>3</sub>), 1.04 (t, *J* = 7.4 Hz, 3H, CH<sub>3</sub>CH<sub>2</sub>), 0.23 (s, 9H, TMS) ppm. <sup>13</sup>C NMR (75.48 MHz, CDCl<sub>3</sub>):  $\delta$  121.9 (CN), 70.2 (C), 36.4 (CH<sub>2</sub>), 28.4 (CH<sub>3</sub>), 8.6 (CH<sub>3</sub>), 1.21 (TMS) ppm.

**1-((Trimethylsilyl)oxy)cyclohexane-1-carbonitrile (3g).** This product has been previously reported.<sup>13</sup> <sup>1</sup>H NMR (300.13 MHz, CDCl<sub>3</sub>):  $\delta$  2.10–2.00 (m, 2H, CH<sub>2</sub>), 1.75–1.70 (m, 2H, CH<sub>2</sub>), 1.70–1.45 (m, 6H, CH<sub>2</sub> x 3), 1.30–1.20 (m, 2H, CH<sub>2</sub>), 0.23 (s, 9H, TMS) ppm. <sup>13</sup>C NMR (75.48 MHz, CDCl<sub>3</sub>):  $\delta$  121.9 (CN), 70.6 (C), 39.3 (CH<sub>2</sub>), 24.5 (CH<sub>2</sub>), 22.6 (CH<sub>2</sub>), 1.38 (TMS) ppm.

**1-Phenylethan-1-ol (4a).** This product has been previously reported.<sup>15</sup> <sup>1</sup>H NMR (300.13 MHz, CDCl<sub>3</sub>):  $\delta$  7.30–7.20 (m, 5H, ArH), 4.82 (q, *J* = 6.5 Hz, 1H, CH), 1.83 (br s, 1H, OH), 1.42 (d, *J* = 6.5 Hz, 3H, CH<sub>3</sub>) ppm. <sup>13</sup>C NMR (75.48 MHz, CDCl<sub>3</sub>):  $\delta$  145.8 (*C*<sub>ipso</sub>), 128.5 (ArCH), 127.5 (ArCH), 125.3 (ArCH), 70.4 (CH), 25.1 (CH<sub>3</sub>) ppm.

**1-(4-Isobutylphenyl)ethan-1-ol (4b).** This product has been previously reported.<sup>16</sup> <sup>1</sup>H NMR (400 MHz, CDCl<sub>3</sub>):  $\delta$  7.27 (d, *J* = 8.0 Hz, 2H, ArH), 7.12 (d, *J* = 8.0 Hz, 2H, ArH), 4.86 (q, *J* = 6.4 Hz, 1H, CH), 2.46 (d, *J* = 7.2 Hz, 2H, CH<sub>2</sub>), 2.12 (br s, 1H, OH), 2.00–1.75 (m, 1H, CH), 1.48 (d, *J* = 6.5 Hz, 3H, CH<sub>3</sub>CHOH), 0.90 (d, *J* = 6.4 Hz, 6H, CH<sub>3</sub> x 2). <sup>13</sup>C NMR (75.48 MHz, CDCl<sub>3</sub>):  $\delta$  143.0, 141.0, 129.2, 125.2, 70.3, 45.1, 30.2, 25.0, 22.4 ppm.

**1-(4-Methoxyphenyl)ethan-1-ol (4c).** This product has been previously reported.<sup>15</sup> <sup>1</sup>H NMR (300.13 MHz, CDCl<sub>3</sub>):  $\delta$  7.30 (d, *J* = 8.6 Hz, 2H, ArH), 6.88 (d, *J* = 8.6 Hz, 2H, ArH), 7.85 (q, *J* = 6.5 Hz, 1H, CH), 3.8 (s, 3H, MeO), 1.48 (d, *J* = 6.5 Hz, 3H, CH<sub>3</sub>) ppm.

<sup>13</sup>C NMR (75.48 MHz, CDCl<sub>3</sub>): δ 159.0 (*C<sub>ipso</sub>*), 138.0 (*C<sub>ipso</sub>*), 130.6 (ArCH), 113.6 (ArCH), 70.0 (CH), 55.2 (OMe), 25.0 (CH<sub>3</sub>) ppm.

**1-(4-Chlorophenyl)ethan-1-ol (4d).** This product has been previously reported.<sup>15</sup> <sup>1</sup>H NMR (300.13 MHz, CDCl<sub>3</sub>): δ 7.30–7.25 (m, 5H, ArH), 4.88 (q, *J* = 6.5 Hz, 1H, CH), 1.85 (br s, 1H, OH), 1.47 (d, *J* = 6.5 Hz, 3H, CH<sub>3</sub>) ppm. <sup>13</sup>C NMR (75.48 MHz, CDCl<sub>3</sub>): δ 144.2 (*C<sub>ipso</sub>*), 133.0 (*C<sub>ipso</sub>*), 128.6 (ArCH), 126.8 (ArCH), 69.7 (CH), 25.2 (CH<sub>3</sub>) ppm.

**1-(3-Chlorophenyl)ethan-1-ol (4e).** This product has been previously reported.<sup>17</sup> <sup>1</sup>H NMR (300.13 MHz, CDCl<sub>3</sub>): δ 7.40–7.35 (m, 1H, ArH), 7.30–7.25 (m, 3H, ArH), 4.91 (q, *J* = 6.4 Hz, 1H, CH), 1.83 (br s, 1H, OH), 1.51 (d, *J* = 6.4 Hz, 3H, CH<sub>3</sub>) ppm. <sup>13</sup>C NMR (75.48 MHz, CDCl<sub>3</sub>): δ 147.8 (*C<sub>ipso</sub>*), 134.4 (*C<sub>ipso</sub>*), 129.8 (ArCH), 127.6 (ArCH), 125.6 (ArCH), 123.5 (ArCH), 69.8 (CH), 25.3 (CH<sub>3</sub>) ppm.

**1-(2-Chlorophenyl)ethan-1-ol (4f).** This product has been previously reported.<sup>17</sup> <sup>1</sup>H NMR (300.13 MHz, CDCl<sub>3</sub>): δ 7.61 (d, *J* = 7.7 Hz, 1H, ArH), 7.35–7.30 (m, 2H, ArH), 7.25–7.20 (m, 1H, ArH), 5.31 (q, *J* = 6.4 Hz, 1H, CH), 2.2 (br s, 1H, OH), 1.51 (d, *J* = 6.4 Hz, 3H, CH<sub>3</sub>) ppm. <sup>13</sup>C NMR (75.48 MHz, CDCl<sub>3</sub>): δ 143.0 (*C<sub>ipso</sub>*), 131.6 (*C<sub>ipso</sub>*), 129.4 (ArCH), 128.3 (ArCH), 127.2 (ArCH), 126.4 (ArCH), 66.9 (CH), 23.5 (CH<sub>3</sub>) ppm.

**1-(2,4-Difluorophenyl)ethan-1-ol (4g).** This product has been previously reported.<sup>18</sup> <sup>1</sup>H NMR (300.13 MHz, CDCl<sub>3</sub>): δ 7.55–7.45 (m, 1H, ArH), 6.95–6.85 (m, 1H, ArH), 6.85–6.75 (m, 1H, ArH), 5.25–5.10 (m, 1H, CH), 1.52 (d, *J* = 6.5 Hz, 3H, CH<sub>3</sub>) ppm. <sup>13</sup>C NMR (75.48 MHz, CDCl<sub>3</sub>): δ 162.1 (dd, *J* = 247.8, 12.2 Hz), 159.6 (dd, *J* = 248.1, 11.9 Hz), 128.6 (dd, *J* = 13.7, 3.8 Hz), 127.5 (dd, *J* = 9.5, 6.5 Hz), 111.2 (dd, *J* = 20.9, 3.5 Hz), 103.6 (t, *J* = 25.4 Hz), 63.9 (d, *J* = 2.5 Hz), 24.0 ppm. <sup>19</sup>F-NMR (CDCl<sub>3</sub>, 282.37 MHz): δ -112.1 (d, *J* = 6.6 Hz), -116.1 (d, *J* = 7.1 Hz) ppm.

**2,2,2-Trifluoro-1-(4-fluorophenyl)ethan-1-ol (4h):** This product has been previously reported.<sup>19</sup> <sup>1</sup>H NMR (300.13 MHz, CDCl<sub>3</sub>): δ 7.55–7.45 (m, 2H, ArH), 7.15–7.10 (m, 2H, ArH), 5.15–5.00 (m, 1H, CH), 2.78 (br s, 1H, OH) ppm. <sup>13</sup>C NMR (75.48 MHz, CDCl<sub>3</sub>): δ 163.4 (d, <sup>1</sup>*J*<sub>C-F</sub> = 248.4 Hz), 129.8 (*C<sub>ipso</sub>*), 129.3 (d, <sup>3</sup>*J*<sub>C-F</sub> = 8.3 Hz), 124.1 (q, <sup>1</sup>*J*<sub>C-F</sub> = 282.2 Hz), 115.6 (d, <sup>2</sup>*J*<sub>C-F</sub> = 21.5 Hz), 72.1 (q, <sup>2</sup>*J*<sub>C-F</sub> = 32.1 Hz) ppm. <sup>19</sup>F-NMR (CDCl<sub>3</sub>, 282.5 MHz): δ -78.6 (d, *J* = 6.1 Hz, 3F), -111.9 (m, 1F) ppm.

**1-(Pyridin-2-yl)ethan-1-ol (4i).** This product has been previously reported.<sup>20</sup> <sup>1</sup>H NMR (300.13 MHz, CDCl<sub>3</sub>): δ 8.55 (d, *J* = 4.8 Hz, 1H, ArH), 7.75–7.65 (m, 1H, ArH), 7.30 (d, *J* = 8.1 Hz, 1H, ArH), 7.30–7.20 (m, 1H, ArH), 4.91 (q, *J* = 6.5 Hz, 1H, CH), 4.35 (br s, 1H, OH), 1.52 (d, *J* = 6.5 Hz, 3H, CH<sub>3</sub>) ppm. <sup>13</sup>C NMR (75.48 MHz, CDCl<sub>3</sub>): δ 163.0 (*C<sub>ipso</sub>*), 148.1 (ArCH), 136.8 (ArCH), 122.2 (ArCH), 119.8 (ArCH), 68.8 (CH), 24.25 (CH<sub>3</sub>) ppm.

**Diphenylmethanol (4j):** This product has been previously reported.<sup>16</sup> <sup>1</sup>H NMR (400 MHz, CDCl<sub>3</sub>): δ 7.45–7.25 (m, 10 H, Ar-H), 5.87 (s, 1 H, CH), 2.52 (s, 1 H, OH) ppm.

$^{13}\text{C}$  NMR (75.48 MHz,  $\text{CDCl}_3$ ):  $\delta$  143.8 ( $\text{C}_{\text{ipso}}$ ), 128.5 (ArCH), 127.6 (ArCH), 126.5 (ArCH), 76.2 (CH) ppm.

**(*E*)-1,3-Diphenylprop-2-en-1-ol (4k):** This product has been previously reported.<sup>21</sup>  $^1\text{H}$  NMR (300.13 MHz,  $\text{CDCl}_3$ ):  $\delta$  7.55–7.20 (m, 10H, ArH), 6.73 (d,  $J$  = 15.9 Hz, 1H,  $\text{CH-Ph}$ ), 6.42 (dd,  $J$  = 15.9, 6.5 Hz, 1H,  $\text{CH=CH-Ph}$ ), 5.42 (d,  $J$  = 6.5 Hz, 1H,  $\text{CH-OH}$ ), 2.19 (br s, 1H, OH) ppm.  $^{13}\text{C}$  NMR (75.48 MHz,  $\text{CDCl}_3$ ):  $\delta$  124.7 ( $\text{C}_{\text{ipso}}$ ), 136.5 ( $\text{C}_{\text{ipso}}$ ), 131.5, 130.5, 128.6 (ArCH), 128.5 (ArCH), 127.76, 127.74 (ArCH), 126.6 (ArCH), 126.3, 75.1 (CH) ppm.

**Butan-2-ol (4m).** This product has been previously reported.<sup>22</sup>  $^1\text{H}$  NMR (300.13 MHz,  $\text{CDCl}_3$ ):  $\delta$  3.75–3.70 (m, 1H, CH), 1.67 (br s, 1H, OH), 1.50–1.45 (m, 2H,  $\text{CH}_2$ ), 1.18 (d,  $J$  = 6.2 Hz, 3H,  $\text{CH}_3\text{-CH}$ ), 0.93 (t,  $J$  = 7.5 Hz, 3H,  $\text{CH}_3\text{-CH}_2$ ) ppm.  $^{13}\text{C}$  NMR (75.48 MHz,  $\text{CDCl}_3$ ):  $\delta$  69.4 (CH), 32.0 ( $\text{CH}_2$ ), 22.8 ( $\text{CH}_3$ ), 9.9 ( $\text{CH}_3$ ) ppm.

**Cyclohexanol (4n):** This product has been previously reported.<sup>23,24</sup>  $^1\text{H}$  NMR (300.13 MHz,  $\text{CDCl}_3$ ):  $\delta$  3.70–3.55 (m, 1H, CH), 2.05 (br s, 1H, OH), 2.00–1.85 (m, 2H,  $\text{CH}_2$ ), 1.80–1.65 (m, 2H,  $\text{CH}_2$ ), 1.60–1.45 (m, 2H,  $\text{CH}_2$ ), 1.40–1.20 (m, 4H,  $\text{CH}_2 \times 2$ ) ppm.  $^{13}\text{C}$  NMR (75.48 MHz,  $\text{CDCl}_3$ ):  $\delta$  70.3 (CH), 35.5 ( $\text{CH}_2$ ), 25.4 ( $\text{CH}_2$ ), 24.1 ( $\text{CH}_2$ ) ppm.

**1,2,3,4-Tetrahydronaphthalen-1-ol (4o):** This product has been previously reported.<sup>16</sup>  $^1\text{H}$  NMR (300.13 MHz,  $\text{CDCl}_3$ ):  $\delta$  7.50–7.40 (m, 1 H, ArH), 7.30–7.05 (m, 3 H, ArH), 4.85–4.75 (m, 1 H,  $\text{CH-OH}$ ), 2.90–2.70 (m, 2 H,  $\text{CH}_2$ ), 2.10–1.70 (m, 5 H,  $\text{CH}_2 \times 2$ , CH) ppm.  $^{13}\text{C}$  NMR (75.48 MHz,  $\text{CDCl}_3$ ):  $\delta$  138.8 ( $\text{C}_{\text{ipso}}$ ), 137.1 ( $\text{C}_{\text{ipso}}$ ), 129.0 (ArCH), 128.7 (ArCH), 127.6 (ArCH), 126.2 (ArCH), 68.1 (CH), 32.3 ( $\text{CH}_2$ ), 29.2 ( $\text{CH}_2$ ), 18.8 ( $\text{CH}_2$ ) ppm.

**(1*r*,3*r*,5*r*,7*r*)-Adamantan-2-ol (4p):** This product has been previously reported.  $^1\text{H}$  NMR (300.13 MHz,  $\text{CDCl}_3$ ):  $\delta$  3.95–3.85 (m, 1H, CH), 2.50–1.50 (m, 15H) ppm.  $^{13}\text{C}$  NMR (75.48 MHz,  $\text{CDCl}_3$ ):  $\delta$  74.5 (CH), 37.5 ( $\text{CH}_2$ ), 36.2 ( $\text{CH}_2$ ), 34.5 (CH), 31.0 ( $\text{CH}_2$ ), 27.5 (CH), 27.0 (CH) ppm.

## 14. Catalyst Recyclability

**Recyclability of the catalyst in the cyanosilylation reaction:** In a 1 mL vial with a septum screw capped equipped with a stirring bar, the catalysts **Y/Eu-MOF** (6.4 mg, 0.5 mol%) were weighed. Then, the corresponding amount of acetophenone (56  $\mu$ L, 0.5 mmol) followed by TMSCN (68  $\mu$ L, 0.55 mmol, 1.1 equiv.) were added and the reaction was stirred under inert N<sub>2</sub> atmosphere at room temperature overnight. After this time, 1.5 mL of DCM was added to the reaction mixture and transferred to a centrifuge tube for the separation of the catalyst. The centrifugation of the mixture was carried out at 12300 rpm during 5 min. After that, the solution was eliminated, and the catalyst was washed with DCM (2 x 1.5 mL). Later on, the catalyst was dried under vacuum and reused in the next cycle of the reaction with the same reaction conditions previously described.

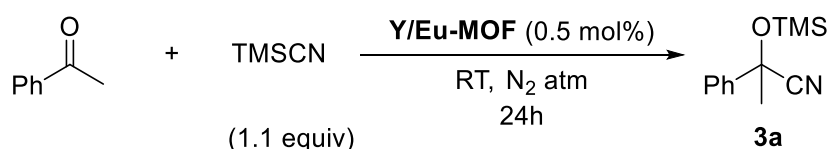

**Scheme S1.** Reaction conditions used for the study of recyclability of **Y/Eu-MOF** catalysts in the cyanosilylation reaction.

**Recyclability of the catalyst in the hydroboration reaction:** In a 1 mL vial with a septum screw capped equipped with a stirring bar, the catalysts **Y/Eu-MOF** (9.2 mg, 0.5 mol%) were weighed. Then, the corresponding amount of acetophenone (84  $\mu$ L, 0.75 mmol) followed by HBPIn (120  $\mu$ L, 0.825 mmol, 1.1 equiv.) were added and the reaction was stirred under inert N<sub>2</sub> atmosphere at room temperature overnight. After this time, 1.5 mL of DCM was added to the reaction mixture and transferred to a centrifuge tube for the separation of the catalyst. The centrifugation of the mixture was carried out at 12300 rpm during 5 min. After that, the solution was eliminated, and the catalyst was washed with DCM (2 x 1.5 mL). Later on, the catalyst was dried under vacuum and reused in the next cycle of the reaction with the same reaction conditions previously described.

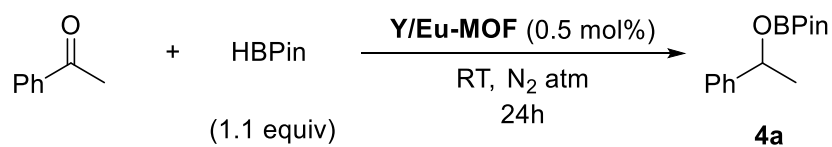

**Scheme S2.** Reaction conditions used for the study of recyclability of **Y/Eu-MOF** catalysts in the hydroboration reaction.

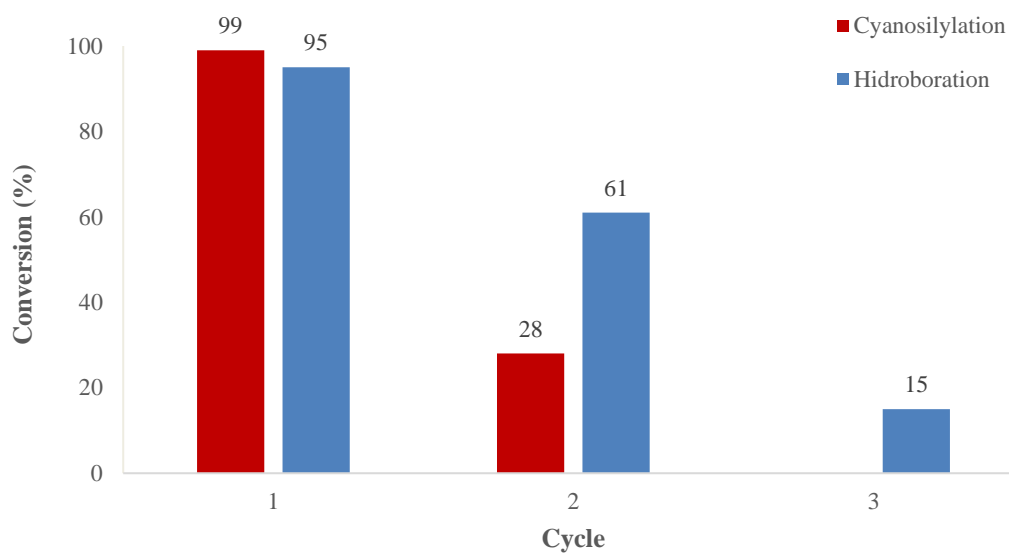

**Figure S10.** Study of the recyclability of **Y/Eu-MOF** (0.5 mol%) catalyst on the cyanosilylation and hydroboration reaction of acetophenone as carbonyl substrate.

## 15. Leaching test

**Leaching test:** after the first and second reaction of the recyclability test was complete in the hydroboration reaction, the reaction was centrifuged and the supernatant was filtered through a plug of celite and dried under vacuum. Later, 1-(pyridin-2-yl)ethan-1-one (86  $\mu$ L, 0.75 mmol) and HBPIn (120  $\mu$ L, 0.825 mmol, 1.1 equiv.) were added to the crude of the corresponding reaction cycle and the reaction was stirred under inert  $N_2$  atmosphere at room temperature during 24 h. After that time, an aliquot was analysed by  $^1H$  NMR obtaining in 38 % and 13 % of product **4j**, corroborating that the leaching of Y or Eu take place.

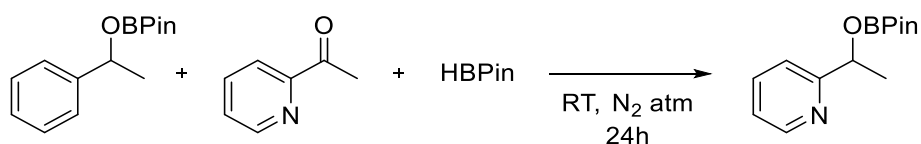

**Scheme S3.** Leaching test carried out after the first and second cycle.

## 16. TOF of Y/Eu-MOF

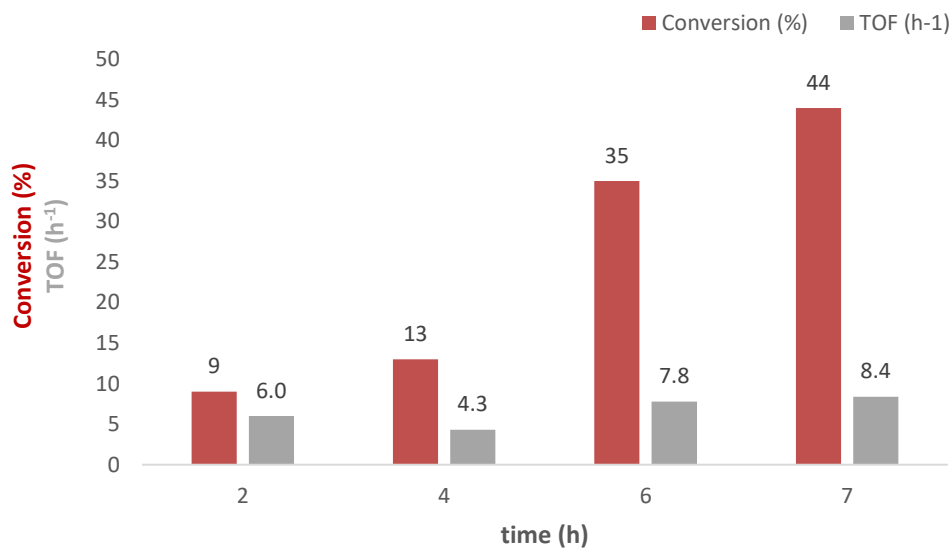

**Figure S11.** Analysis of the TOF (h<sup>-1</sup>) obtained in the cyanosilylation reaction of acetophenone at different times of reaction with **Y/Eu-MOF** (0.5 mol%) with the optimized reaction conditions.

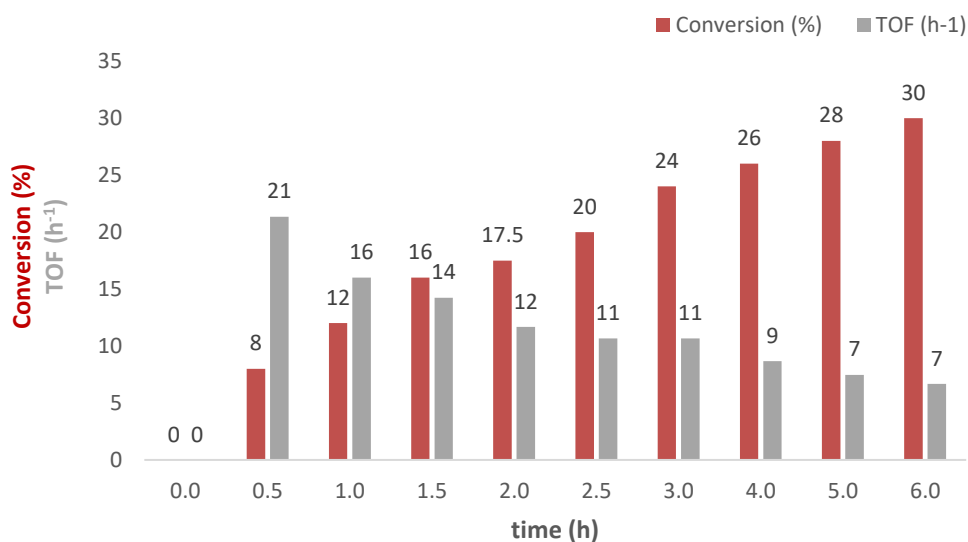

**Figure S12.** Analysis of the TOF (h<sup>-1</sup>) obtained in the hydroboration reaction of acetophenone at different times of reaction with **Y/Eu-MOF** (0.5 mol%) with the optimized reaction conditions.

## 17. Green chemistry metrics

**Table S9.** Green metrics calculated for **Y/Eu-MOF** catalyst.

| <b>Sample</b>          | <b>AE (Atom Economy) (%)</b> | <b>MI (Mass Intensity)</b> | <b>RME (Reaction Mass Efficiency)</b> | <b>CE (Carbon Efficiency)</b> |
|------------------------|------------------------------|----------------------------|---------------------------------------|-------------------------------|
| <b>Cyanosilylation</b> | 100                          | 1.127                      | 95.7                                  | 96.8                          |
| <b>Hydroboration</b>   | 49.1                         | 2.406                      | 46.8                                  | 52.1                          |



## 18. Results obtained with different lanthanides MOF catalysts.

**Table S10.** Catalytic cyanosilylation of benzaldehyde performances of Ln-MOFs reported in the literature.

| MOF                                                                                         | mol% MOF | mol% RE | Recyclability  | Conversion                                                                                         | Conditions             | Ratio <sup>[a]</sup> | TOF h <sup>-1</sup>     | Ref.   |
|---------------------------------------------------------------------------------------------|----------|---------|----------------|----------------------------------------------------------------------------------------------------|------------------------|----------------------|-------------------------|--------|
| Eu <sub>2</sub> (MELL)(H <sub>2</sub> O) <sub>6</sub> <sup>[b]</sup>                        | 10       | 20      | 5 cycles       | >99% (3h)                                                                                          | RT, MeCN               | 1:2                  | 3.2 h <sup>-1</sup>     | [7]    |
| [Sm/Dy/Yb(3,5-DSB)(Phen)(H <sub>2</sub> O)]·H <sub>2</sub> O <sup>[c]</sup>                 | 2        | 2       | 4 cycles       | >99% (3h) (Sm)<br>70%, 3h (Dy)<br>50%, 3h (Yb)                                                     | 40 °C,                 | 1:1.5                | 6-79 h <sup>-1</sup>    | [8–10] |
| Sm/Eu/Gd/Tb/Eu-Gd/Eu-Tb-psa <sup>[d]</sup>                                                  | 5        | 5       | 3 cycles       | 70%, <2h (Eu)<br>80%, <2h (Sm)<br>87%, <2h (Eu-Gd)<br>74%, <2h (Tb)<br>94%, <2h (Eu-Tb)            | RT, DCM                | 1:1.5                | 84-112 h <sup>-1</sup>  | [11]   |
| Nd/Eu/Sm/Ho/Yb/Er-dms <sup>[e]</sup>                                                        | 5        | 10      | 3 cycles       | 85%, <1h (Nd)<br>96%, <1h (Eu)<br>92%, <2h (Sm)<br>79%, <2h (Ho)<br>98%, <2h (Yb)<br>93%, <2h (Er) | RT, DCM                | 1:1.5                | 159-234 h <sup>-1</sup> | [12]   |
| Nd, Ho, Er, Yb-btc <sup>[f]</sup>                                                           | 4.5      | 4.5     | 5 cycles       | >99%, 2h                                                                                           | RT, DCM                | 1:2                  | 1-11 h <sup>-1</sup>    | [13]   |
| Tm(BDC) <sub>1.5</sub> (DMF)-(H <sub>2</sub> O) <sup>[g]</sup>                              | 2        | 2       | <sup>[h]</sup> | 57%, 5h                                                                                            | RT                     | 1:1                  | <sup>[h]</sup>          | [14]   |
| La/Ce/Nd/Sm/Dy(L)(NO <sub>3</sub> )(DMF) <sub>2</sub> ] <sub>n</sub> ·n(DMF) <sup>[i]</sup> | 3        | 3       | 5 cycles       | 93%, 2h (La)<br>94%, 2h (Ce)<br>91%, 2h (Nd)<br>89%, 2h (Sm)<br>90%, 2h (Dy)                       | RT                     | 1:4                  | 2-16 h <sup>-1</sup>    | [15]   |
| Tb-TCA <sup>[j]</sup>                                                                       | 2        | 2       | <sup>[h]</sup> | 78%, 4h                                                                                            | RT, DCM <sup>[k]</sup> | 1:2.4                | 9.8 h <sup>-1</sup>     | [16]   |

|                                                                                                                                                              |      |            |          |                                              |         |     |                                                                      |      |
|--------------------------------------------------------------------------------------------------------------------------------------------------------------|------|------------|----------|----------------------------------------------|---------|-----|----------------------------------------------------------------------|------|
| [Sm(L-H <sub>2</sub> )(R-L-H <sub>3</sub> )(H <sub>2</sub> O) <sub>4</sub> ].nH <sub>2</sub> O <sup>[l]</sup>                                                | 10   | 10         | [h]      | 69%, 16h                                     | RT, DCM | 1:2 | 0.4 h <sup>-1</sup>                                                  | [17] |
| [Yb <sub>2</sub> (L) <sub>2</sub> (H <sub>2</sub> O) <sub>3</sub> ].2H <sub>2</sub> O <sup>[m]</sup>                                                         | 1.4  | 2.8        | 5 cycles | >99%, 24h                                    | RT      | 1:2 | 5 h <sup>-1</sup>                                                    | [18] |
| [Pr(L <sup>OMe</sup> )(H <sub>2</sub> O) <sub>4</sub> ].2.5DMA.3 H <sub>2</sub> O <sup>[n]</sup>                                                             | 1.9  | 1.9        | 2 cycles | 99%, 14h                                     | RT      | 1:2 | 3.8 h <sup>-1</sup>                                                  | [19] |
| [Sm(H <sub>2</sub> O) <sub>5</sub> ][Sm(H <sub>2</sub> O) <sub>7</sub> ][Co <sub>2</sub> Mo <sub>10</sub> H <sub>4</sub> O <sub>38</sub> ].6H <sub>2</sub> O | 2    | 4          | 3 cycles | 98%, 5h                                      | RT      | 1:3 | 9.8 h <sup>-1</sup>                                                  | [20] |
| [La/Ce/Nd(H <sub>2</sub> O) <sub>5</sub> ] <sub>2</sub> Mo <sub>6</sub> V <sub>2</sub> O <sub>26</sub> .8H <sub>2</sub> O                                    | 1    | 2          | 3 cycles | 94%, 5h (La)<br>90%, 5h (Ce)<br>96%, 5h (Nd) | RT      | 1:3 | 10.4 h <sup>-1</sup><br>10.0 h <sup>-1</sup><br>13.7 h <sup>-1</sup> | [21] |
| Our <b>Y-MOF</b> catalyst                                                                                                                                    | 0.5  | 2.5        | 7 cycles | >99%, 5h                                     | RT      | 1:1 | 106 h <sup>-1</sup>                                                  | [22] |
| Our <b>GR-MOF-6</b> catalyst                                                                                                                                 | 0.5  | 0.5        | 7 cycles | >99%, 7.5h                                   | RT      | 1:1 | 108 h <sup>-1</sup>                                                  | [23] |
| Our <b>Eu-MOF</b> catalyst                                                                                                                                   | 0.5  | 2.5        | 7 cycles | >99%, 30 min                                 | RT      | 1:1 | 1301 h <sup>-1</sup>                                                 |      |
| Our <b>Y/Eu-MOF</b> catalyst                                                                                                                                 | 0.35 | 1.2Y/0.5Eu | 2 cycles | >99%, 24h                                    | RT      | 1:1 | 8.4 h <sup>-1</sup>                                                  |      |

<sup>[a]</sup> Ratio between benzaldehyde **1a** and TMSCN; <sup>[b]</sup> MELL = mellitic acid; <sup>[c]</sup> 3,5-DSB = 3,5-disulfobenzoate, Phen = 1,10-phenanthroline; <sup>[d]</sup> psa = 2-phenylsuccinate; <sup>[e]</sup> dms = 2,3-dimethylsuccinate; <sup>[f]</sup> btc = 1,3,5-benzenetricarboxylate; <sup>[g]</sup> BDC = 1,4-benzenedicarboxylate; <sup>[h]</sup> Not given; <sup>[i]</sup> L = 5-[2-{2,4,6-trioxotetrahydropyrimidin-5(2*H*)-ylidene}hydrazinyl]isophthalate; <sup>[j]</sup> TCA = tricarboxytriphenylamine; <sup>[k]</sup> The aldehyde employed is 2-nitrobenzaldehyde. <sup>[l]</sup> L-H<sub>4</sub> = 2,2'-diethoxy-1,1'-binaphthalene-6,6'-bisphosphonic acid. <sup>[m]</sup> L = 4,4',4''-((2,4,6-trimethylbenzene-1,3,5-triyl)tris(methylene))tribenzoate; <sup>[n]</sup> L<sup>OMe</sup> = 3,3'-((2,3,6,7-tetramethoxyanthracene-9,10-diyl)bis(4,1-phenylene))diacrylate.

## 19. References

1. Bruker Apex2, B.A.I. Bruker Apex2, Bruker AXS Inc. 2004.
2. Sheldrick, G.M. SADABS 1996, Program for Empirical Adsorption Correction.
3. Sheldrick, G.M. A short history of SHELX. *Acta Crystallogr. Sect. A Found. Crystallogr.* **2008**, *64*, 112–122, doi:10.1107/S0108767307043930.
4. Sheldrick, G.M. Crystal structure refinement with SHELXL. *Acta Crystallogr. Sect. C Struct. Chem.* **2015**, *71*, 3–8, doi:10.1107/S2053229614024218.
5. Farrugia, L.J. WinGX and ORTEP for Windows: An update. *J. Appl. Crystallogr.* **2012**, *45*, 849–854, doi:10.1107/S0021889812029111.
6. J. Rodríguez-Carvajal FULLPROF 2000, version 2.5d., *FULLPROF 2000, version 2.5d, Lab. Léon Brillouin (CEA-CNRS), Cent. d'Études Saclay, Gif sur Yvette Cedex, Fr.* 2000.
7. Batista, P.K.; Alves, D.J.M.; Rodrigues, M.O.; De Sá, G.F.; Junior, S.A.; Vale, J.A. Tuning the catalytic activity of lanthanide-organic framework for the cyanosilylation of aldehydes. *J. Mol. Catal. A Chem.* **2013**, *379*, 68–71, doi:10.1016/j.molcata.2013.07.016.
8. Dvries, R.F.; De La Peña-Oshea, V.A.; Snejko, N.; Iglesias, M.; Gutiérrez-Puebla, E.; Monge, M.Á. Insight into the correlation between net topology and ligand coordination mode in new lanthanide MOFs heterogeneous catalysts: A theoretical and experimental approach. *Cryst. Growth Des.* **2012**, *12*, 5535–5545, doi:10.1021/cg301096d.
9. Dvries, R.F.; Iglesias, M.; Snejko, N.; Gutiérrez-Puebla, E.; Monge, M.A. Lanthanide metal-organic frameworks: Searching for efficient solvent-free catalysts. *Inorg. Chem.* **2012**, *51*, 11349–11355, doi:10.1021/ic300816r.
10. Dvries, R.F.; Snejko, N.; Iglesias, M.; Gutiérrez-Puebla, E.; Monge, M.A. Ln-MOF pseudo-merohedral twinned crystalline family as solvent-free heterogeneous catalysts. *Cryst. Growth Des.* **2014**, *14*, 2516–2521, doi:10.1021/cg5002336.
11. Gomez, G.E.; Kaczmarek, A.M.; Van Deun, R.; Brusau, E. V.; Narda, G.E.; Vega, D.; Iglesias, M.; Gutierrez-Puebla, E.; Monge, M.Á. Photoluminescence, Unconventional-Range Temperature Sensing, and Efficient Catalytic Activities of Lanthanide Metal-Organic Frameworks. *Eur. J. Inorg. Chem.* **2016**, *2016*, 1577–1588, doi:10.1002/ejic.201501402.
12. Gomez, G.E.; Brusau, E. V.; Sacanell, J.; Soler Illia, G.J.A.A.; Narda, G.E. Insight into the Metal Content-Structure-Property Relationship in Lanthanide Metal-Organic Frameworks: Optical Studies, Magnetism, and Catalytic Performance. *Eur. J. Inorg. Chem.* **2018**, *2018*, 2452–2460, doi:10.1002/ejic.201701474.
13. Gustafsson, M.; Bartoszewicz, A.; Martín-Matute, B.; Sun, J.; Grins, J.; Zhao, T.; Li, Z.; Zhu, G.; Zou, X. A family of highly stable lanthanide metal-organic frameworks: Structural evolution and catalytic activity. *Chem. Mater.* **2010**, *22*, 3316–3322, doi:10.1021/cm100503q.
14. He, H.; Ma, H.; Sun, D.; Zhang, L.; Wang, R.; Sun, D. Porous lanthanide-organic frameworks: Control over interpenetration, gas adsorption, and catalyst properties. *Cryst. Growth Des.* **2013**, *13*, 3154–3161, doi:10.1021/cg400531j.
15. Karmakar, A.; Rúbio, G.M.D.M.; Paul, A.; Guedes da Silva, M.F.C.; Mahmudov, K.T.; Guseinov, F.I.; Carabineiro, S.A.C.; Pombeiro, A.J.L. Lanthanide metal organic

- frameworks based on dicarboxyl-functionalized arylhydrazone of barbituric acid: Syntheses, structures, luminescence and catalytic cyanosilylation of aldehydes. *Dalton Trans.* **2017**, 46, 8649–8657, doi:10.1039/c7dt01056g.
16. Wu, P.; Wang, J.; Li, Y.; He, C.; Xie, Z.; Duan, C. Luminescent Sensing and Catalytic Performances of a Multifunctional Lanthanide-Organic Framework Comprising a Triphenylamine Moiety. *Adv. Funct. Mater.* **2011**, 21, 2788–2794, doi:10.1002/adfm.201100115.
  17. Evans, O.R.; Ngo, H.L.; Lin, W. Chiral porous solids based on lamellar lanthanide phosphonates. *J. Am. Chem. Soc.* **2001**, 123, 10395–10396, doi:10.1021/ja0163772.
  18. Wang, X.; Zhang, L.; Yang, J.; Liu, F.; Dai, F.; Wang, R.; Sun, D. Lanthanide metal-organic frameworks containing a novel flexible ligand for luminescence sensing of small organic molecules and selective adsorption. *J. Mater. Chem. A* **2015**, 3, 12777–12785, doi:10.1039/c5ta00061k.
  19. Liu, X.; Lin, H.; Xiao, Z.; Fan, W.; Huang, A.; Wang, R.; Zhang, L.; Sun, D. Multifunctional lanthanide–organic frameworks for fluorescent sensing, gas separation and catalysis. **2016**, 45, 3743–3749, doi:10.1039/c5dt04339e.
  20. An, H.; Wang, L.; Hu, Y.; Fei, F. Temperature-induced racemic compounds and chiral conglomerates based on polyoxometalates and lanthanides: Syntheses, structures and catalytic properties. *CrystEngComm* **2015**, 17, 1531–1540, doi:10.1039/c4ce01802h.
  21. Fei, F.; An, H.; Meng, C.; Wang, L.; Wang, H. Lanthanide-supported molybdenum-vanadium oxide clusters: syntheses, structures and catalytic properties. **2015**, 18796–18805, doi:10.1039/c4ra16237d.
  22. Echenique-Errandonea, E.; Pérez, J.M.; Rojas, S.; Cepeda, J.; Seco, J.M.; Fernández, I.; Rodríguez-Diéguez, A. A novel yttrium-based metal-organic framework for the efficient solvent-free catalytic synthesis of cyanohydrin silyl ethers. *Dalton Trans.* **2021**, 50, 11720–11724, doi:10.1039/d1dt01953h.
  23. Pérez, J.M.; Rojas, S.; García-García, A.; Montes-Andrés, H.; Martínez, C.R.; Romero-Cano, M.S.; Choquesillo-Lazarte, D.; Abdelkader-Fernández, V.K.; Pérez-Mendoza, M.; Cepeda, J.; et al. Catalytic Performance and Electrophoretic Behavior of an Yttrium–Organic Framework Based on a Tricarboxylic Asymmetric Alkyne. *Inorg. Chem.* **2022**, acs.inorgchem.1c02864, doi:10.1021/ACS.INORGCHEM.1C02864.
